# Supplementary material for: Cationic Oligospermine-Oligonucleotide Conjugates Provide Carrier-free Splice Switching in Monolayer Cells and Spheroids
Source: PubMed Central journal article supplement — Mol Ther Nucleic Acids. 2018 Oct 10;13:483–92. doi: 10.1016/j.omtn.2018.09.027 (PMC6205332; doi:10.1016/j.omtn.2018.09.027), 2018-10-10
Supplement: mmc1.pdf [file mmc1.pdf]

**OMTN, Volume 13**

## **Supplemental Information**

**Cationic Oligospermine-Oligonucleotide**

**Conjugates Provide Carrier-free Splice**

**Switching in Monolayer Cells and Spheroids**

**Marc Nothisen, Phanélie Perche-Létuvée, Jean-Paul Behr, Jean-Serge Remy, and Mitsuharu Kotera**

## Supplemental Information

# Cationic oligospermine-oligonucleotide conjugates provide carrier-free splice switching in monolayer cells and in spheroids

Marc Nothisen<sup>1</sup>, Phanélie Perche-Létuvé<sup>2</sup>, Jean-Paul Behr<sup>2</sup>, Jean-Serge Remy<sup>1</sup>, and Mitsuharu Kotera<sup>2</sup>

<sup>1</sup>Laboratoire de Chimie Biofonctionnelle, Université de Strasbourg, CNRS, CAMB UMR 7199, LabEx MEDALIS, Faculté de Pharmacie, F-67400 Illkirch, France

<sup>2</sup>Laboratoire V-SAT, Université de Strasbourg, CNRS, CAMB UMR 7199, LabEx MEDALIS, Faculté de Pharmacie, F-67400 Illkirch, France

### Content

|                                                                                                                   |    |
|-------------------------------------------------------------------------------------------------------------------|----|
| SDS-PAGE of <b>S<sub>n</sub></b> -SSOs.....                                                                       | S2 |
| Delivery of fluorescently labelled SSOs in 3D culture of HeLa pLuc/705 cells analyzed by confocal microscopy..... | S3 |
| MALDI-TOF spectrum of [ON705].....                                                                                | S4 |
| MALDI-TOF spectrum of <b>S<sub>5</sub></b> -[ON705].....                                                          | S4 |
| MALDI-TOF spectrum of <b>S<sub>15</sub></b> -[ON705].....                                                         | S5 |
| MALDI-TOF spectrum of <b>S<sub>20</sub></b> -[ON705].....                                                         | S5 |
| MALDI-TOF spectrum of <b>S<sub>20</sub></b> -[ON705mis].....                                                      | S6 |
| MALDI-TOF spectrum of <b>S<sub>20</sub></b> -[ON705]-F.....                                                       | S6 |
| MALDI-TOF spectrum of [ON705]-F.....                                                                              | S7 |
| MALDI-TOF spectrum of [ON705]-F (extended).....                                                                   | S7 |

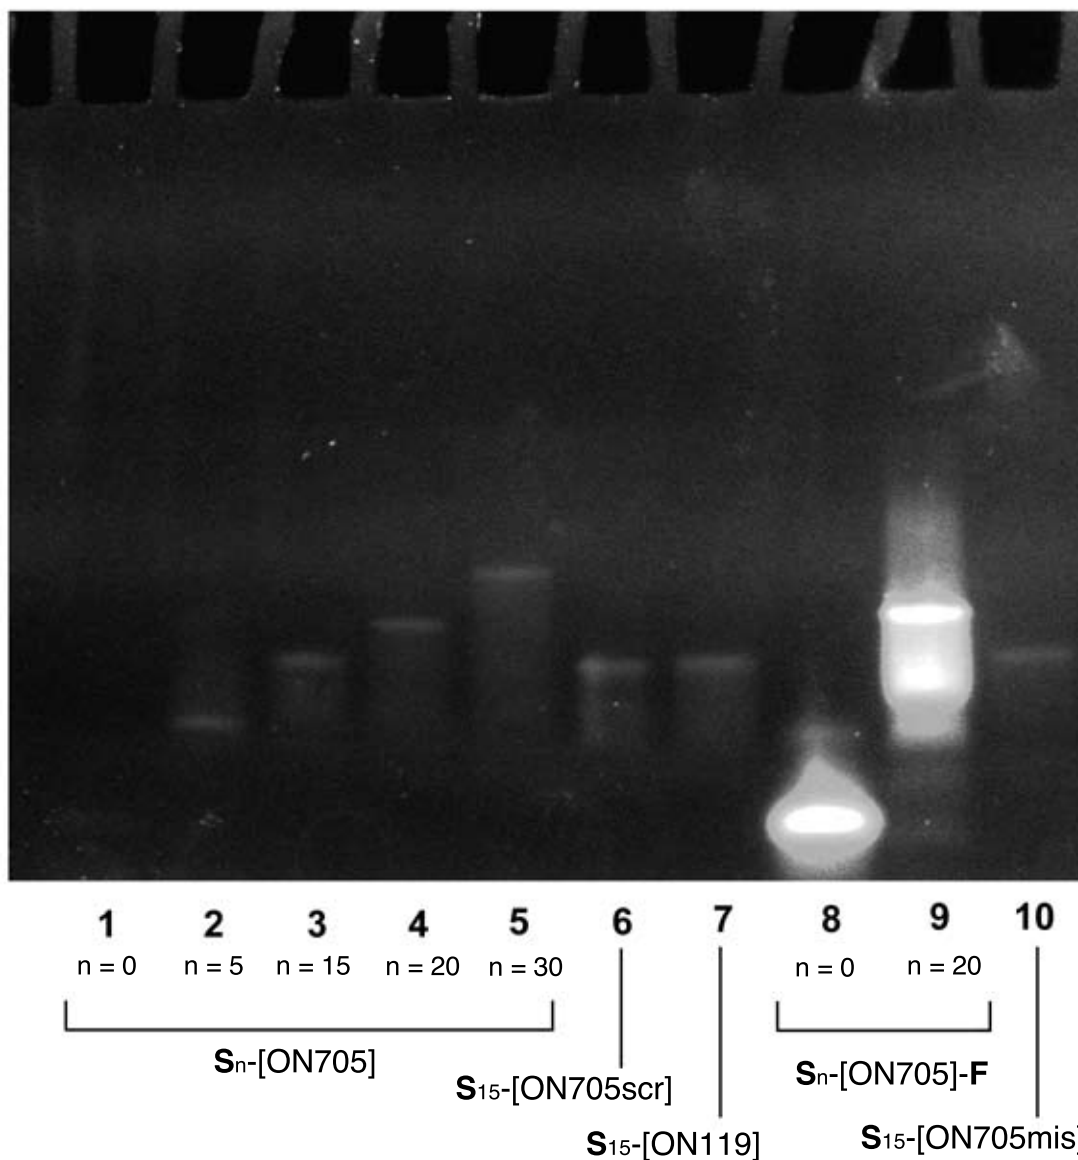

**Figure S1.** SDS-PAGE of  $S_n$ -SSOs. 400 pmols of single strand oligospermine conjugates were loaded on 4-12% Bis-Tris precast gels (Criterion<sup>TM</sup> XT, Bio-Rad). Electrophoresis was carried out in XT-MES denaturing running buffer during 2 h at 75 V. Precast gels were then incubated in ethidium bromide (0.5  $\mu$ g/mL) and analyzed. Lane 1, [ON705]. Lane 2-5,  $S_n$ -[ON705] ( $n = 5, 15, 20, 30$ ). Lane 6,  $S_{15}$ -[ON705scr]. Lane 7,  $S_{15}$ -[ON119]. Lane 8, [ON705]-F. Lane 9,  $S_{20}$ -[ON705]-F. Lane 10,  $S_{15}$ -[ON705mis].

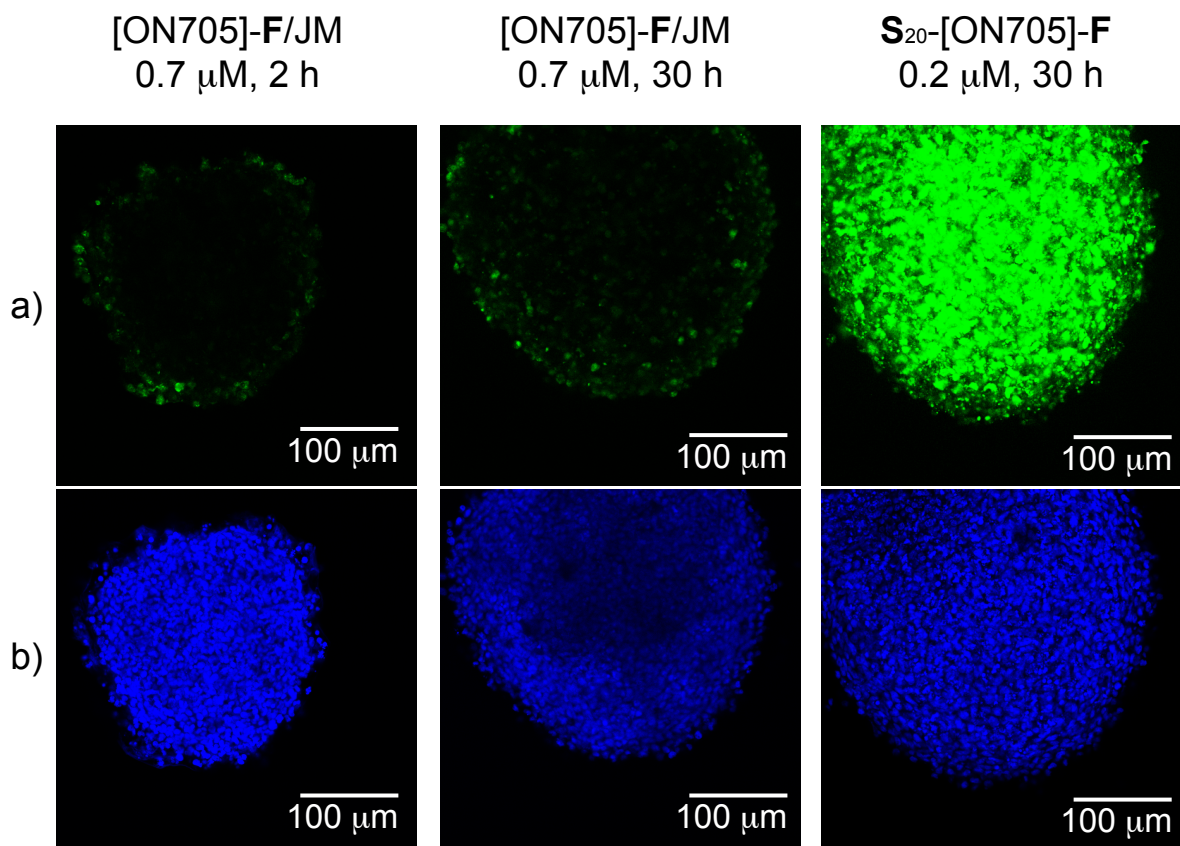

**Figure S2.** Delivery of fluorescently labelled SSOs in 3D culture of HeLa pLuc/705 cells analyzed by confocal microscopy. To 2-day old HeLa pLuc/705 spheroids in serum-containing DMEM (10%) was added [ON705]-F complexed with JM (JetMessenger™) or **S**<sub>20</sub>-[ON705]-F. Images were taken after 2 h and 30 h. a) Fluorescein (488 nm), b) Nuclei (405 nm).

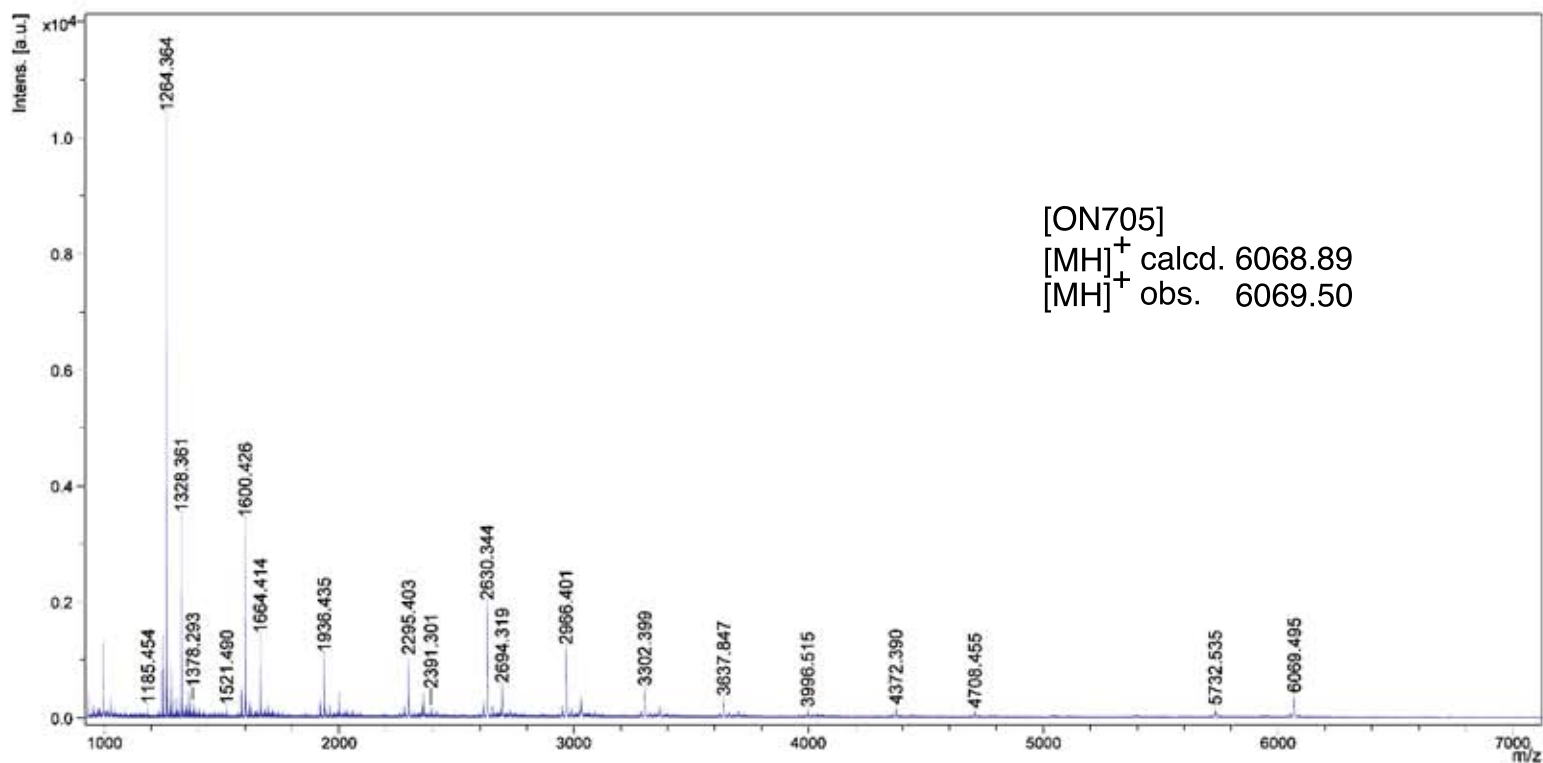

Figure S3. MALDI-TOF spectrum of [ON705]

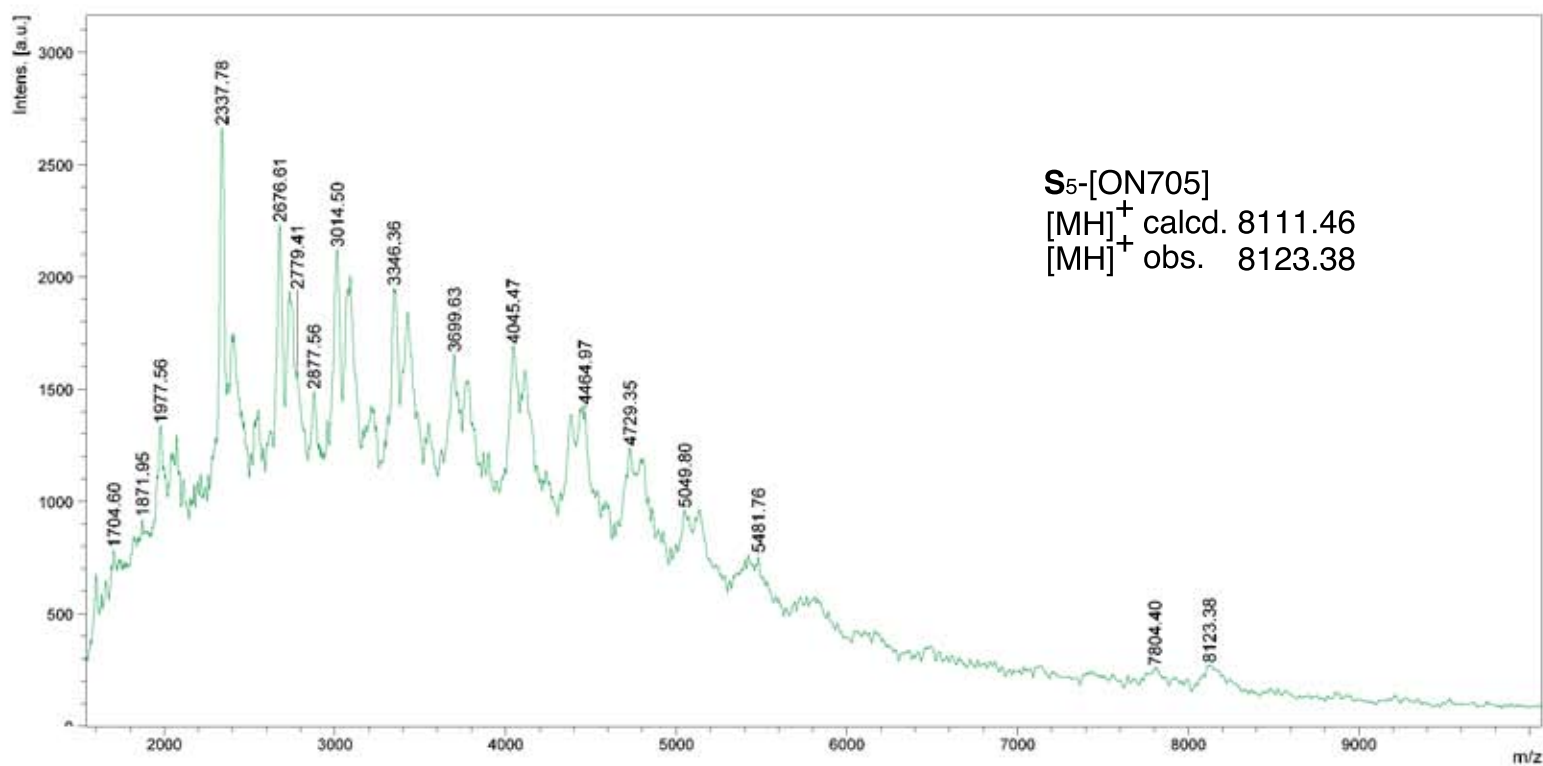

Figure S4. MALDI-TOF spectrum of S5-[ON705]

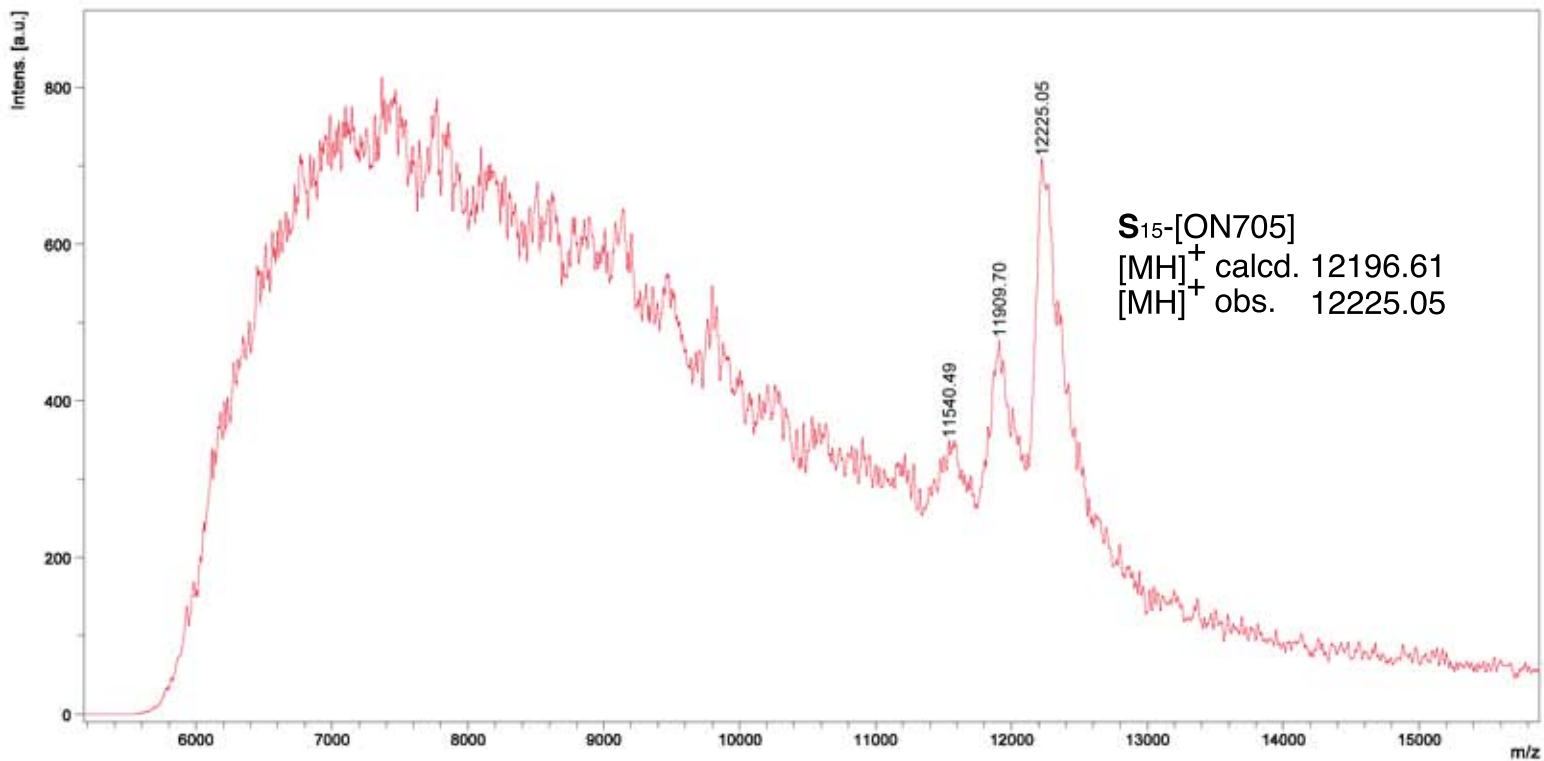

Figure S5. MALDI-TOF spectrum of S15-[ON705]

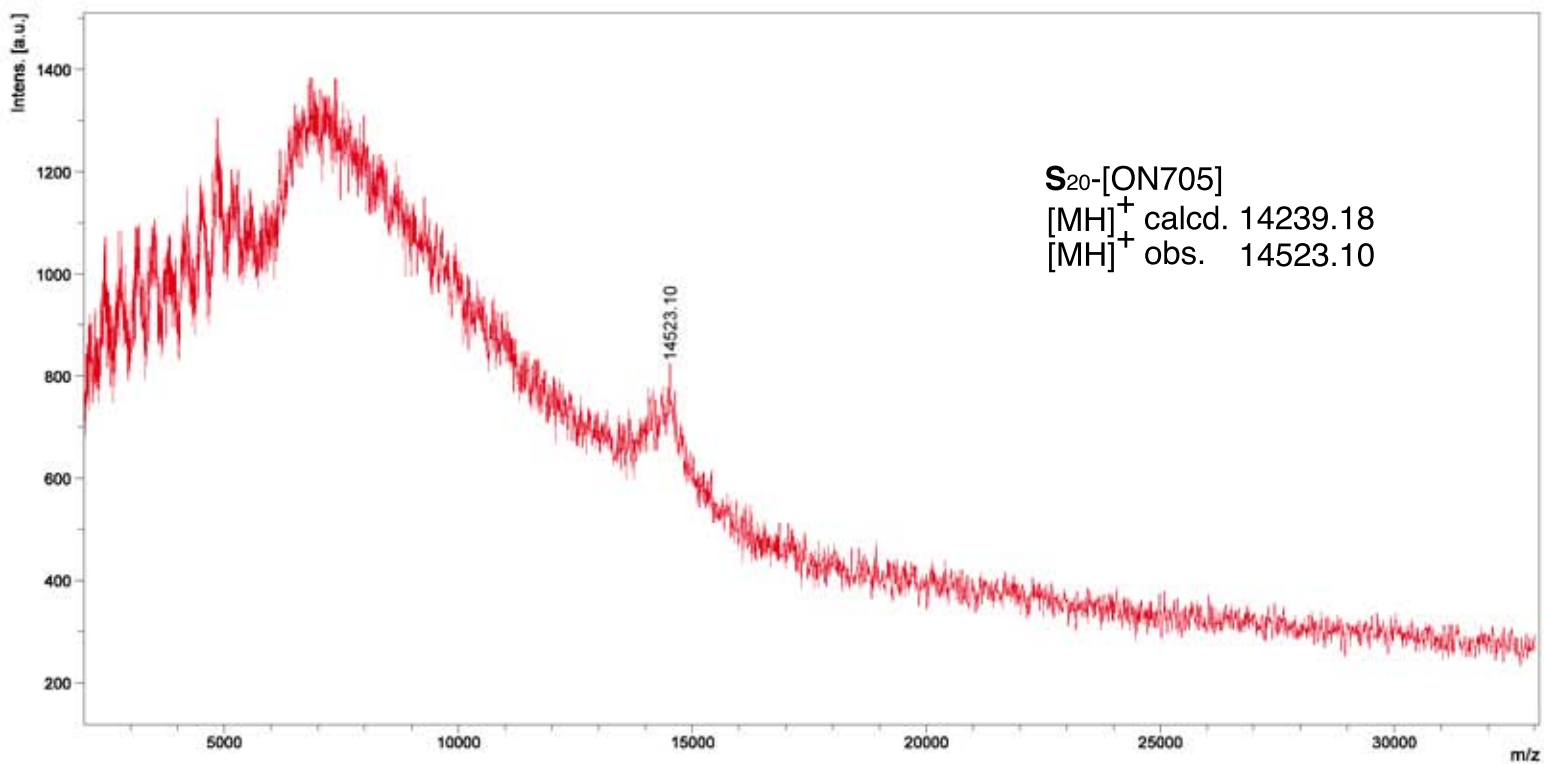

Figure S6. MALDI-TOF spectrum of S20-[ON705]

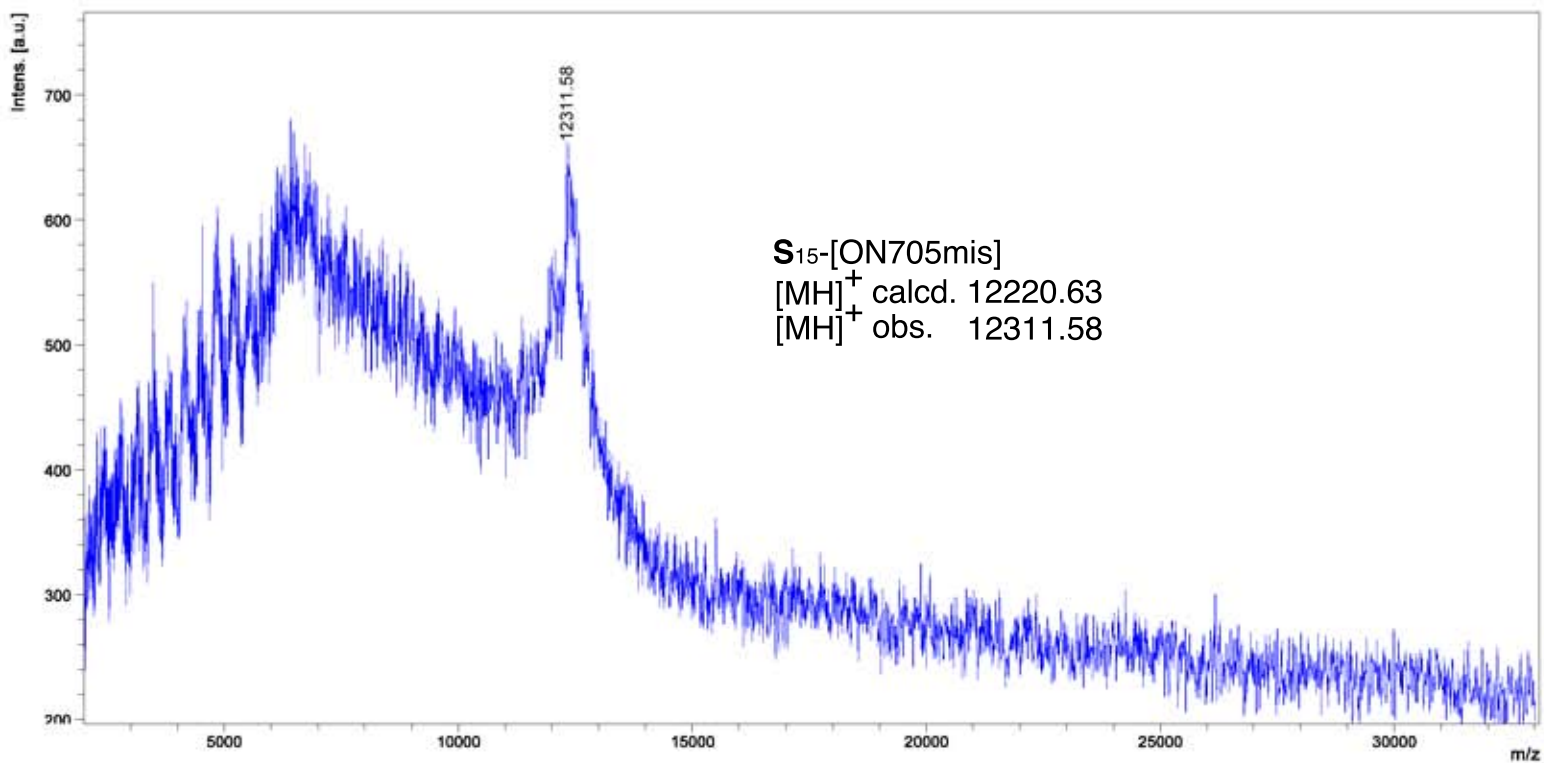

Figure S7. MALDI-TOF spectrum of S20-[ON705mis]

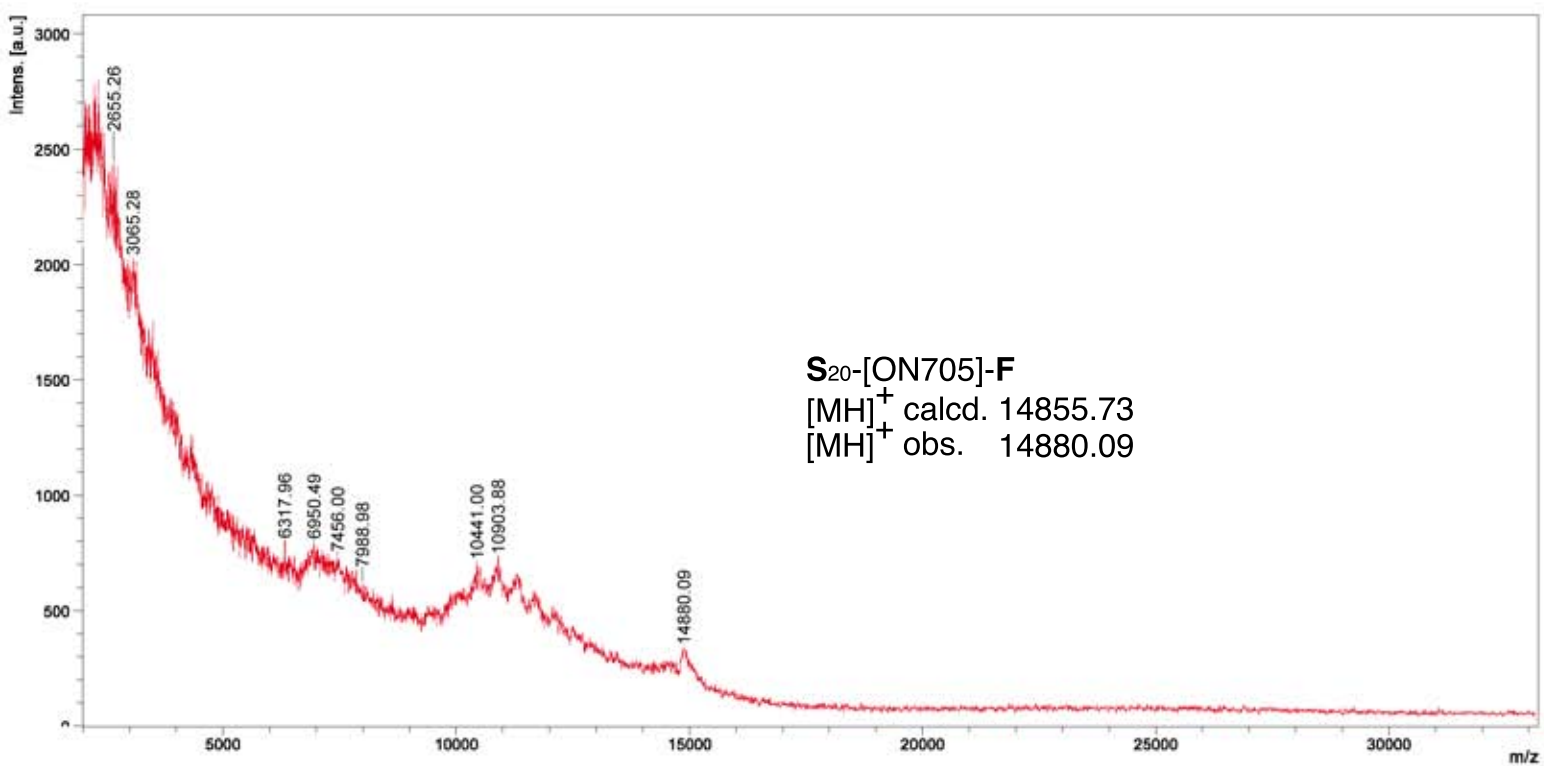

Figure S8. MALDI-TOF spectrum of S20-[ON705]-F

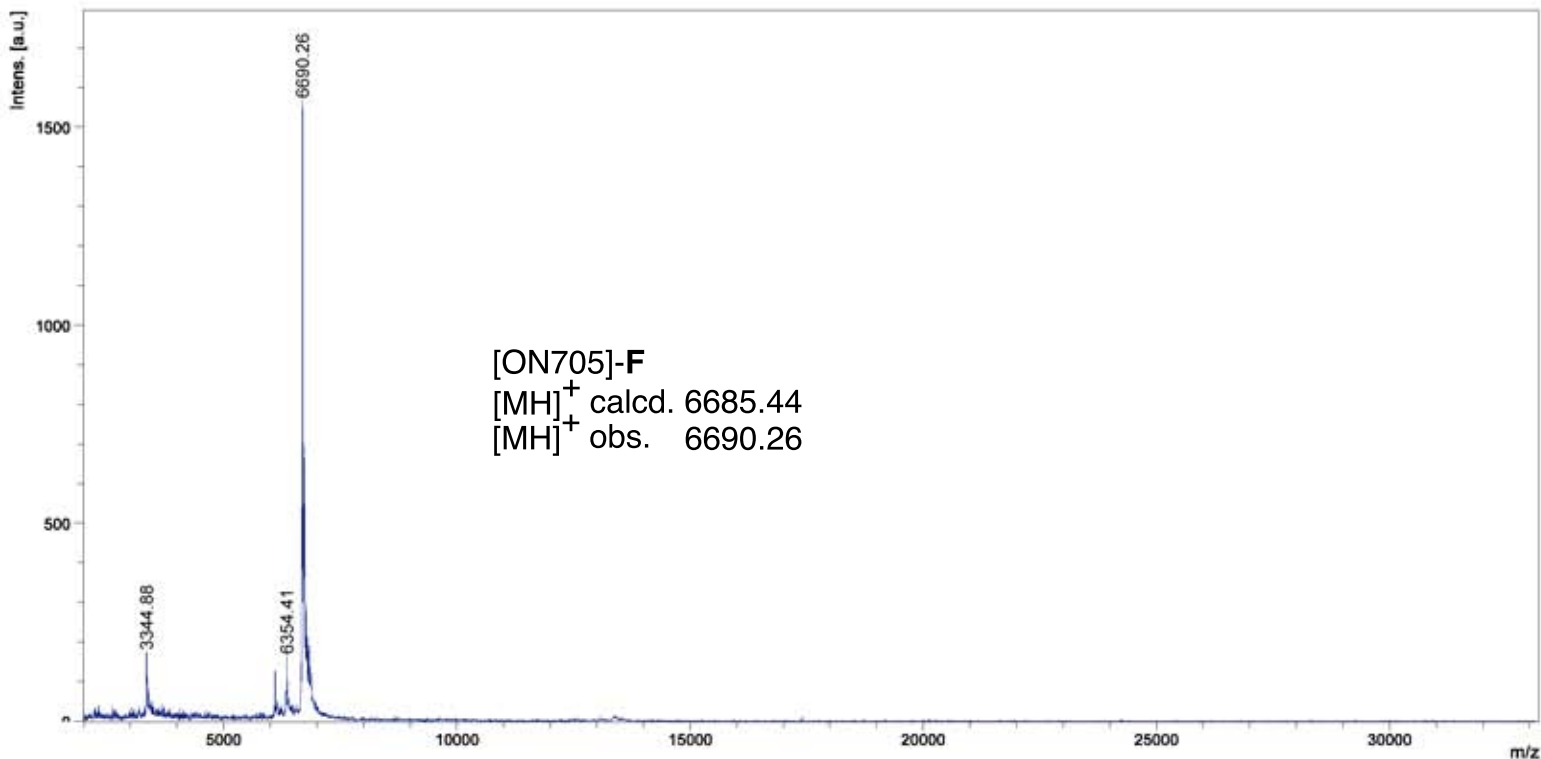

Figure S9. MALDI-TOF spectrum of [ON705]-F

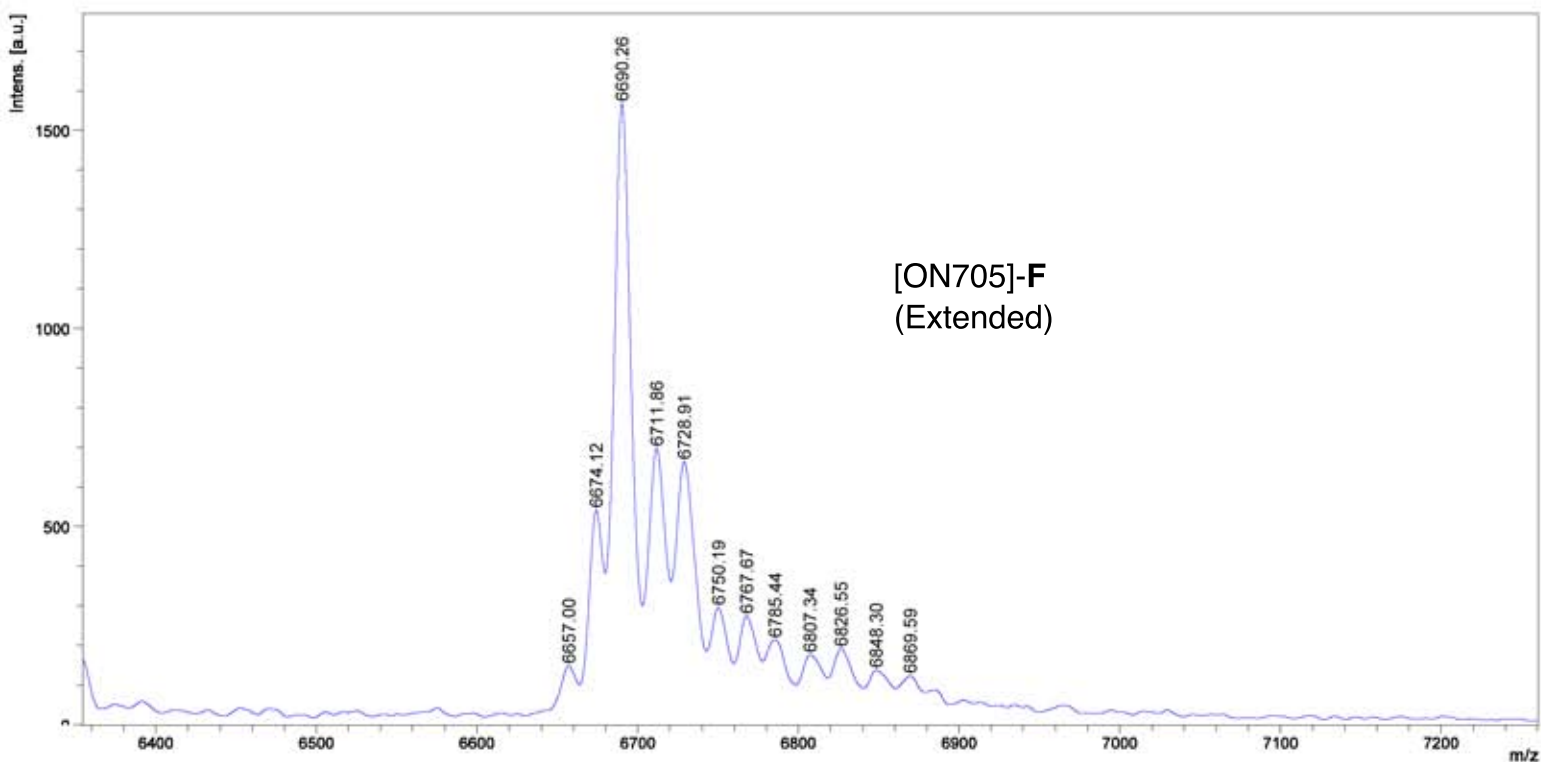

Figure S10. MALDI-TOF spectrum of [ON705]-F (extended)
