# Supplementary material for: Cationic Oligospermine-Oligonucleotide Conjugates Provide Carrier-free Splice Switching in Monolayer Cells and Spheroids
Source: PubMed Central journal article supplement — Mol Ther Nucleic Acids. 2018 Oct 10;13:483–92. doi: 10.1016/j.omtn.2018.09.027 (PMC6205332; doi:10.1016/j.omtn.2018.09.027), 2018-10-10
Supplement: mmc2.pdf [file mmc2.pdf]

# Cationic Oligospermine-Oligonucleotide Conjugates Provide Carrier-free Splice Switching in Monolayer Cells and Spheroids

Marc Nothisen,<sup>1</sup> Phanélie Perche-Létuvéé,<sup>2</sup> Jean-Paul Behr,<sup>2</sup> Jean-Serge Remy,<sup>1</sup> and Mitsuharu Kotera<sup>2</sup>

<sup>1</sup>Laboratoire de Chimie Biofonctionnelle, Université de Strasbourg, CNRS, CAMB UMR 7199, LabEx MEDALIS, Faculté de Pharmacie, 67400 Illkirch, France; <sup>2</sup>Laboratoire V-SAT, Université de Strasbourg, CNRS, CAMB UMR 7199, LabEx MEDALIS, Faculté de Pharmacie, 67400 Illkirch, France

**We report the evaluation of 18-mer 2'-O-methyl-modified ribose oligonucleotides with a full-length phosphorothioate backbone chemically conjugated at the 5' end to the oligospermine units ( $S_n$ :  $n = 5, 15, 20, 25,$  and  $30$  [number of spermine units]) as splice switching oligonucleotides (SSOs). These conjugates contain, in their structure, covalently linked oligocation moieties, making them capable of penetrating cells without transfection vector. In cell culture, we observed efficient cytoplasmic and nuclear delivery of fluorescein-labeled  $S_{20}$ -SSO by fluorescent microscopy. The SSO conjugates containing more than 15 spermine units induced significant carrier-free exon skipping at nanomolar concentration in the absence and in the presence of serum. With an increasing number of spermine units, the conjugates became slightly toxic but more active. Advantages of these molecules were particularly demonstrated in three-dimensional (3D) cell culture (multicellular tumor spheroids [MCTSs]) that mimics living tissues. Whereas vector-complexed SSOs displayed a drastically reduced splice switching in MCTS compared with the assay in monolayer culture, an efficient exon skipping without significant toxicity was observed with oligospermine-grafted SSOs ( $S_{15}$ - and  $S_{20}$ -SSOs) transfected without vector. It was shown, by flow cytometry and confocal microscopy, that the fluorescein-labeled  $S_{20}$ -SSO was freely diffusing and penetrating the innermost cells of MCTS, whereas the vector-complexed SSO penetrated only the cells of the spheroid's outer layer.**

## INTRODUCTION

Splice switching oligonucleotide (SSO) is one of the most advanced families of therapeutic oligonucleotides, being extremely valuable for the treatment of genetic diseases including Duchenne muscular dystrophy and spinal muscular atrophy.<sup>1–6</sup> SSOs are 15- to 30-mer oligonucleotide analogs that bind specifically and tightly to pre-mRNA targets, thus inducing an alternative splicing. A wide variety of chemically modified oligonucleotides is commercially available, possessing several desired properties for SSO drugs, for example, enhanced hybridization against RNA and improved stability against chemical and enzymatic degradations. In particular, SSOs based on the phosphorodiamidate morpholino oligonucleotide (PMO) and

the 2'-methoxyethyl phosphorothioate oligonucleotide (2'-MOE/PS) led to the first approvals of SSO drugs by the US Food and Drug Administration (FDA) in 2016, even though further improvements are still required to increase their efficacy.<sup>7–10</sup> Contrary to classical drugs of low molecular weight ( $MW < 500$ ), SSOs are macromolecular compounds ( $MW > 6$  kDa) with high polarity. Their efficacy is mainly limited by their poor delivery to the target cells, and the development of an efficient, reliable, and less toxic delivery method remains the main challenge in this area. Our approach is to link covalently SSOs to a well-defined cationic vector by solid-phase chemistry.

We already reported the use of DMT-spermine phosphoramidite (Figure 1) as a versatile reagent compatible with solid-phase oligonucleotide synthesis for the attachment of the desired number of spermine moieties to oligonucleotides,<sup>11,12</sup> which allowed us to synthesize a variety of oligospermine-oligonucleotide conjugates (zip nucleic acids [ZNAs]). When ZNAs are hybridized to their complementary strands, the cationic oligospermine tail acts as a zipper to neutralize the polyanionic internucleotidic phosphates, thus enhancing binding affinity and binding kinetics.<sup>13</sup> These biophysical properties can be finely tuned according to the number of attached spermine units, making ZNA a versatile PCR probe.<sup>14,15</sup> ZNA is commercially available (number of spermine units  $< 10$ ) and used in numerous nucleic-acid-based diagnostic applications.<sup>16</sup> Cationic oligospermines covalently attached to oligonucleotides can also act similarly to the polyamine-type delivery vectors. We described small interfering RNA (siRNA)-oligospermine conjugates containing 30 spermine units that induced an efficient carrier-free luciferase gene silencing.<sup>17–20</sup> Locked nucleic acid (LNA)-oligospermine conjugates

Received 11 September 2018; accepted 15 September 2018;  
<https://doi.org/10.1016/j.omtn.2018.09.027>

**Correspondence:** Mitsuharu Kotera, Laboratoire V-SAT, Université de Strasbourg, CNRS, CAMB UMR 7199, LabEx MEDALIS, Faculté de Pharmacie, 67400 Illkirch, France.

**E-mail:** [m.kotera@unistra.fr](mailto:m.kotera@unistra.fr)

**Correspondence:** Jean-Serge Remy, Laboratoire de Chimie Biofonctionnelle, Université de Strasbourg, CNRS, CAMB UMR 7199, LabEx MEDALIS, Faculté de Pharmacie, 67400 Illkirch, France.

**E-mail:** [remy@unistra.fr](mailto:remy@unistra.fr)

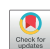



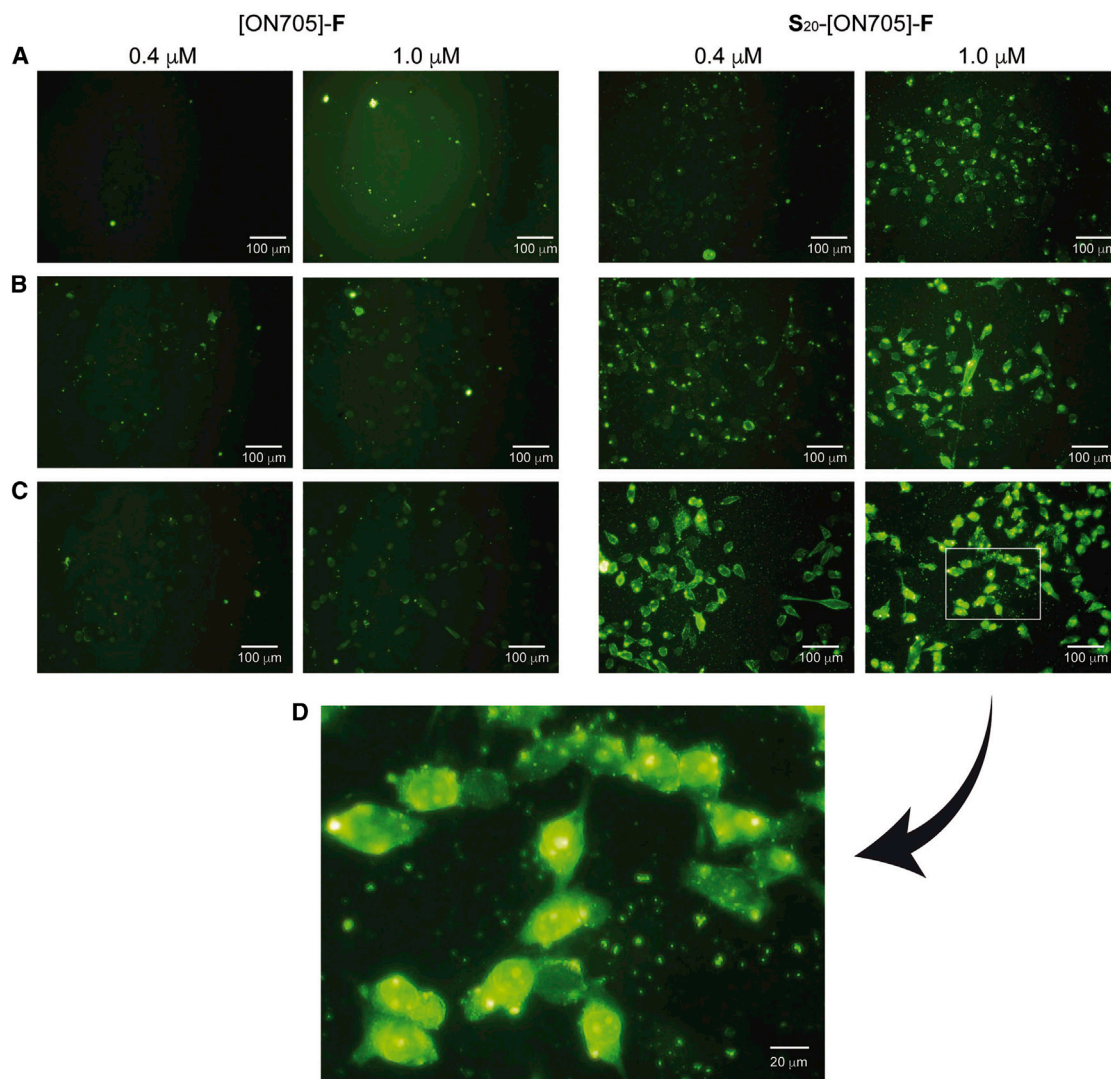

**Figure 2. Carrier-free Cellular Uptake of (S)<sub>20</sub>-[ON705]-F in Monolayer HeLa pLuc/705 Cells**

Fluorescently labeled (S)<sub>20</sub>-[ON705]-F were incubated at the concentrations indicated on the top of images during (A, right panels) 45 min, (B, right panels) 2 hr, and (C, right panels) 4 hr in serum-free medium. Naked [ON705]-F was used as a control in the same conditions (A–C, left panels). Images were taken by fluorescent microscopy using 488-nm laser. (D) Zoom of the right panel in (C).

reported.<sup>17–20</sup> Here, we used two single-stranded fluorescein-labeled SSOs (2'-O-methyloligoribonucleotide phosphorothioate) with and without spermine units to re-evaluate their cell penetration properties (Figure 2). No significant cellular uptake in HeLa cells was observed when unconjugated [ON705]-F was incubated at 0.4 or 1.0 μM for up to 4 hr. In contrast, cellular uptake of (S)<sub>20</sub>-[ON705]-F was already observed at 0.4 μM in 2 hr. Transfection efficacy was progressively increased with dose and over time. All cells were transfected at 1.0 μM after 2 hr and at 0.4 μM after 4 hr. Transfected cells appeared with fluorescent nuclear edge and nucleoli concentration in diffuse green throughout their cytoplasm, highlighting the efficient cytoplasmic and nuclear delivery of (S)<sub>20</sub>-[ON705]-F.

Restoration of luciferase expression was studied by harvesting cells at various times, between 10 and 144 hr after carrier-free transfection of three S<sub>n</sub>-[ON705] (n = 15, 20, and 30) (Figure 3). For all three S<sub>n</sub>-[ON705] tested, luciferase expression increased progressively over 45 hr before decreasing slowly. With S<sub>15</sub>-[ON705] (0.5 μM), a 15-fold increase in luciferase expression was observed after 45 hr of incubation compared with the control cells. Best results were obtained with (S)<sub>20</sub>-[ON705] (0.6 μM), resulting in a 22-fold increase in luciferase expression. However, increasing the number of spermine residues further proved to be detrimental because it resulted in higher levels of toxicity (see below) and lower increase in luciferase expression (7-fold for S<sub>30</sub>-[ON705] at 0.3 μM). Interestingly, with all three

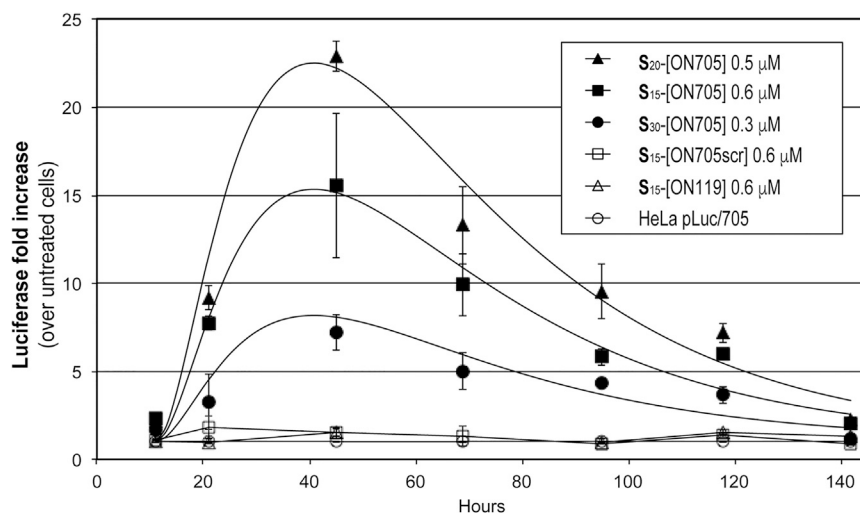

**Figure 3. Time-Course Profile of Carrier-free Splice Switching in Monolayer HeLa pLuc/705 Cells Using  $(S)_n$ -[ON705]**

$(S)_n$ -[ON705] ( $n = 15, 20,$  and  $30$ ) were added to the cells initially in serum-free DMEM, and FBS was added to 10% after 4 hr. Luciferase reporter gene expression levels were periodically measured as RLU/mg of cell proteins and normalized against the levels of untreated cells. All data are presented as mean  $\pm$  SEM of  $n = 3$  separate experiments.

$S_n$ -[ON705] ( $n = 15, 20,$  and  $30$ ), only one transfection was sufficient to observe significant luciferase expression (3- to 7-fold increase), even after 5 days. No significant luciferase expression was observed with  $S_{15}$ -[ON705scr] or with  $S_{15}$ -[ON119].

Dose-dependent splice switching activities of  $S_n$ -[ON705] ( $n = 15, 20,$  and  $25$ ) were next examined. These conjugates were initially incubated in the absence of serum for 4 hr (Figure 4A). Luciferase gene expression was measured after 48 hr (total incubation time), as well as the total cellular protein measurement. We found that a progressive increase in  $S_n$ -[ON705] ( $n = 15, 20,$  and  $25$ ) concentrations from  $0.3 \mu\text{M}$  to  $0.4$  and  $0.5 \mu\text{M}$  resulted in an enhanced restoration of luciferase expression. For example, luciferase expression increased by 2-, 3-, and 14-fold at  $0.3, 0.4,$  and  $0.5 \mu\text{M}$ , respectively, compared with untreated cells, when  $S_{20}$ -[ON705] was employed. However, increasing the concentrations of  $S_{15}$ -[ON705] and  $S_{25}$ -[ON705] from  $0.5$  to  $0.6 \mu\text{M}$  led to no significant change in luciferase expression level. Interestingly,  $S_{20}$ -[ON705] gave better results at  $0.6 \mu\text{M}$ , with a luciferase expression increased by 40-fold. As mentioned previously, luciferase expression restoration was also found to be dependent on the number of conjugated spermine units: levels of luciferase increased by 3-, 14-, and 23-fold with  $S_{15}$ -,  $S_{20}$ -, and  $S_{25}$ -[ON705], respectively, at  $0.5 \mu\text{M}$ . However, higher toxicity was observed with  $S_{20}$ -[ON705] and  $S_{25}$ -[ON705] under these conditions via total cellular protein measurement.

The same SSOs were re-evaluated by adding the conjugate molecules directly in the presence of serum (Figure 4B). Under these conditions, luciferase restoration was slightly less efficient with  $S_n$ -[ON705] ( $n = 15, 20,$  and  $25$ ), even though they were found to be less toxic.

In both experiments in Figure 4, sequence specificity of exon skipping was clearly demonstrated, as  $S_{15}$ -[ON705scr] and  $S_{15}$ -[ON119] were completely inactive ( $S_{15}$ -[ON705mis] was also shown to be inactive in a preliminary study; data not shown). Vector-assisted transfection of

unconjugated [ON705] induced efficient luciferase expression restoration (106- or 104-fold increase in the absence or the presence of serum, respectively) with low toxicity at  $0.2 \mu\text{M}$ .

In summary, data shown in Figures 2, 3, 4, and 5 demonstrate that the oligospermine-grafted 18-mer 2'-*O*-methyloligoribonucleotide phosphorothioates ( $S_n$ -[ON705];  $n = 15, 20,$  and  $25$ ) are efficiently delivered in monolayer cells without vector, and that they induce long-lived splice switching in the presence and in the absence of serum. Even though unconjugated SSOs transfected with a vector were more efficient and less toxic under these experimental conditions, such nanoparticles should be less diffusible *in vivo* than molecular  $S_n$ -SSO drugs to attain the target tissue through interstitial fluid. In order to demonstrate this assumption, 3D cultured cells assays were performed, whose results are described in the following section.

#### Carrier-free Splice Switching with Spermine-Grafted SSOs in MCTS

MCTS is an *in vitro* 3D culture that can be generated by growing cells to form complex spherical structures with 200- to 500- $\mu\text{m}$  diameters. These multicellular spheroids are used as models in drug screening research because of their complexity level lying between standard *in vitro* two-dimensional (2D) monolayer cultures and *in vivo* tumors.<sup>26-29</sup> Here we studied delivery of the oligospermine-conjugated SSOs ( $S_{15}$ - and  $S_{20}$ -[ON705]) in 3D cell culture and found that the cationic SSOs were efficiently penetrating the cells in the inner region of spheroids to restore luciferase gene expression. Vector-assisted transfection of unconjugated [ON705] in MCTS was drastically less efficient than in 2D culture, with their cellular uptake being observed only in the outer layer of spheroids.

We first prepared HeLa pLuc/705 MCTSs using the hanging drop method.<sup>25,30</sup> About 2,500 cells were simply incubated in a suspended droplet of medium ( $25 \mu\text{L}$ ) during 48 hr. The resulting MCTSs were very homogeneous in size (about  $400 \mu\text{m}$  in diameter) and in shape (Figure 5). Twelve MCTSs were gathered per wells for assays. Under these conditions, untreated MCTSs (left photos in Figure 5) continued to grow over the next 46 hr and formed a chaplet-like structure by interacting with neighboring spheroids. The darkening of the central part of each spheroid can be interpreted partly by the

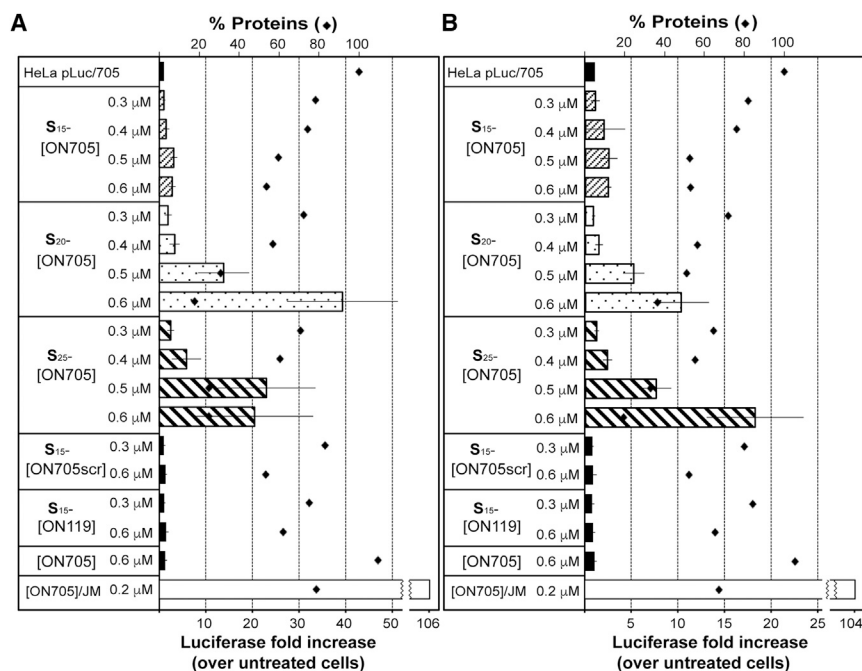

**Figure 4. Carrier-free Splice Switching in Monolayer HeLa pLuc/705 Cells by (S)<sub>n</sub>-[ON705] (n = 15, 20, and 25)**

Luciferase activity was determined after 48 hr of incubation. (A) (S)<sub>n</sub>-[ON705] were incubated for 4 hr in serum-free conditions; then FBS (10%) was added. (B) (S)<sub>n</sub>-[ON705] were added in serum-containing DMEM (10%). The rhombi indicate the total protein measurement. All data are presented as mean ± SEM of n = 3 separate experiments. JM, JetMessenger.

increase of the cell density and partly by the known development of the central hypoxic and necrotic areas.<sup>26</sup> Growth of the spheroids treated with 0.7 μM S<sub>15</sub>-[ON705] is shown in the right photos of Figure 5. These photos are indistinguishable from those of the untreated spheroids, demonstrating that spermine-grafted SSOs present no toxicity under these conditions.

Carrier-free deliveries of S<sub>15</sub>-[ON705] and S<sub>20</sub>-[ON705] in HeLa pLuc/705 MCTSs were then evaluated by luciferase gene expression restoration. Incubation of S<sub>15</sub>-[ON705] or S<sub>20</sub>-[ON705] in increasing concentrations progressively enhanced the luciferase gene expression (Figure 6). For example, increases in luciferase expression were 3-, 6-, and 11-fold at 0.4, 0.7, and 1.0 μM, respectively, with S<sub>15</sub>-[ON705], and 2-, 8-, and 14-fold at 0.4, 0.7, and 1.0 μM with S<sub>20</sub>-[ON705]. Contrary to the aforementioned 2D culture assays, the 20-spermine units grafted SSO (S<sub>20</sub>-[ON705]) was only slightly better than the 15-spermine units grafted SSO (S<sub>15</sub>-[ON705]). As previously mentioned, no significant toxicity was observed in 3D culture, neither with S<sub>15</sub>-[ON705] nor with S<sub>20</sub>-[ON705], even at 1.0 μM, according to the total protein measurement (rhombi in Figure 6). In 3D MCTS, vector-assisted formulation of naked [ON705] induced a reduced level of luciferase expression, as compared with the results obtained in 2D culture. The increase of luciferase expression was only 4-fold, whereas it was 104-fold under the same conditions in monolayer culture.

We further examined the delivery of oligospermine-oligonucleotide conjugates in spheroids by flow cytometry (Figure 7) and confocal microscopy (Figure 8). MCTSs were treated with vector-complexed [ON705]-F and S<sub>20</sub>-[ON705]-F for 48 hr. Fluorescence intensity of

spheroid cells treated with [ON705]-F/JM (Figure 7, yellow) is widely spread over three orders of magnitude. The corresponding confocal microscopy images showed a green ring on the outer spheroid cells indicating that only the exterior spheroid cells were transfected. As seen in Figure S2, this vector-assisted transfection efficiency was not enhanced with higher concentration. Upon carrier-free transfection of spheroids with S<sub>20</sub>-[ON705]-F (Figure 7, blue), a distinct narrow peak corresponding to the high fluorescein active population was

observed by flow cytometry. Efficient delivery of S<sub>20</sub>-[ON705]-F was confirmed by confocal microscopy because green fluorescein-active cells were observed everywhere, including in the innermost part of the spheroids.

## DISCUSSION

In this study, we reported a new SSO-delivery method using oligospermine conjugates. An oligospermine-SSO conjugate containing 15–20 spermine units (S<sub>15</sub>- or S<sub>20</sub>-SSO) penetrates in HeLa pLuc/705 cells without vector to induce splice switching that restores luciferase expression, in the absence and in the presence of serum. Our approach takes advantage of both the cationic vector formulations and the molecule-scale delivery. Cationic vector formulations are the most popular and the most studied oligonucleotide delivery strategies.<sup>8,9,31–33</sup> Oligonucleotides are complexed with cationic vectors to form nanoparticles of typically 100–200 nm and gain enhanced cell penetration properties driven by electrostatic interactions with anionic cellular heparan sulfate proteoglycans.<sup>34</sup> However, it also raises several problems, that is, poor colloidal stability, poor bio-distribution, and toxicity related to the large amount of cationic vector introduced in cells. The other emerging strategy is to use precise molecular conjugates of smaller size (<50 nm) to circumvent these difficulties. Cationic SSOs with *in vivo* activity were prepared by linking oligocationic structures (e.g., peptides containing eight arginines<sup>35,36</sup> or dendrimer with eight guanidine functions<sup>37</sup>) to the PMO that is a neutral oligonucleotide analog. In our approach, oligospermine tails containing an exact number of spermine units were attached to polyanionic SSOs so that the resulting conjugates may transfect as a single molecule by forming an intramolecular complex. Oligospermine moiety will act similarly to the polyethylenimine

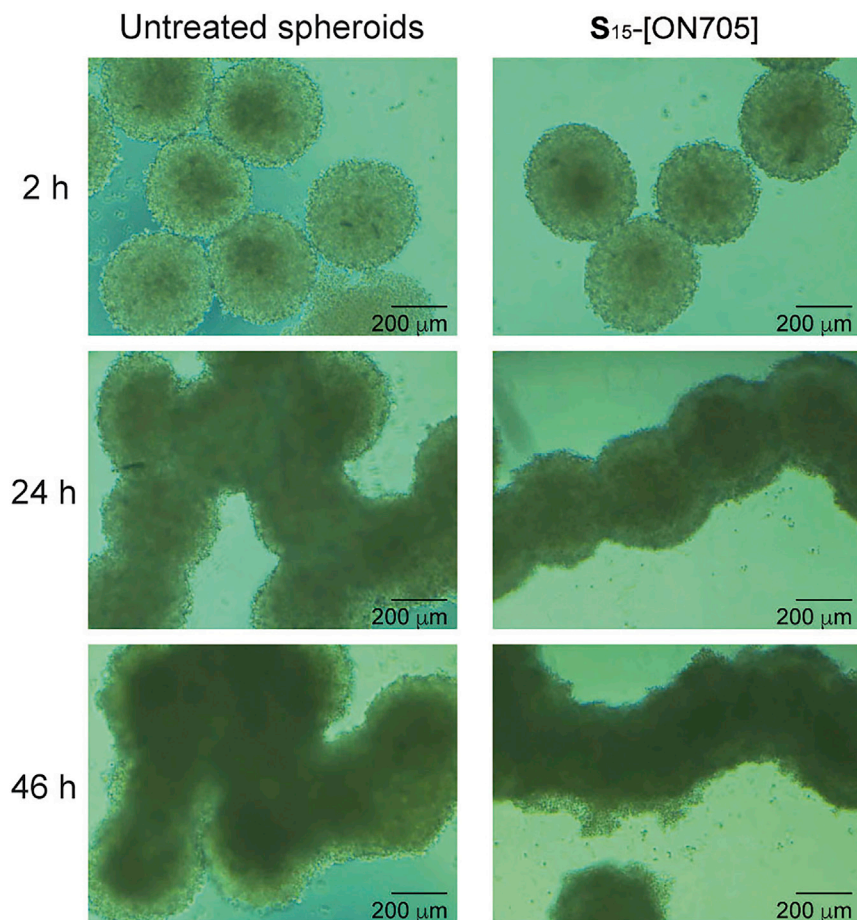

**Figure 5. Morphology of HeLa pLuc/705 MCTS**

Two-day-old spheroids were incubated with (S)<sub>15</sub>-[ON705] 0.7 μM in serum-containing DMEM (10%) for 46 hr. Images were periodically taken by microscopy. (Left) Untreated spheroids. (Right) Spheroids treated with (S)<sub>15</sub>-[ON705].

nor and/or the major groove, enhance duplex stability, and provide a supramolecular structure like a thread reel.

MCTS was recently proposed by Juliano and colleagues<sup>25</sup> as a versatile tool to assess oligonucleotide delivery in 3D cells. These authors described an efficient delivery of 13-nm-size nanoparticle formulation based on human serum albumin linked to PMO-RGD peptide conjugates in MCTS and compared with their lipoplex and polyplex formulations that are inefficient. Relevance of oligospermine-conjugated SSO was evidenced by the assays performed in 3D cell culture. MCTS is a heterogeneously associated spherical cell assembly that is considered as a rational and cost-effective model to assess *in vivo* drug delivery efficacy. In monolayer culture cells, carrier-free SSO-oligospermine delivery was less efficient, as compared with the cationic vector-assisted transfection of unconjugated SSO. However, S<sub>20</sub>-[ON705] induced a higher level of splice switching than the vector-complexed [ON705] in MCTS.

Reduced activity of SSO formulation in MCTS is related to the nanoparticle size (around 100 nm). Whereas molecular S<sub>20</sub>-[ON705] may circulate freely to attain the internal cells of spheroids, [ON705]/JetMessenger complexes will only penetrate to the outer layer cells. Indeed, homogeneous distribution of the fluorescently labeled S<sub>20</sub>-[ON705]-F in MCTS was proven by flow cytometry and by confocal microscopy, whereas the vector-complexed [ON705]-F was observed only as a bright ring by confocal microscopy, indicating local cellular uptake in accordance with the flow cytometry histogram. It should also be noted that S<sub>20</sub>-[ON705] present almost no toxicity in MCTS, whereas a dose-dependent toxicity was observed for the same conjugate in monolayer culture. Further studies are still required to determine the origin of these observations.

Our results open a new scope for oligospermine-oligonucleotide conjugates as these molecules were proven to induce splice switching spontaneously without formulation in cells. Compared with siRNA-oligospermine conjugates, SSO conjugates are about twice as small, and fewer steps are required for their manufacturing. Further improvement of splice switching potency may be achieved by structural tuning of conjugates.

(PEI)-type cationic polymer vector, except that the amount of the vector used is minimized.

Our current study demonstrated efficient carrier-free transfection of SSO attached to an oligospermine tail containing only 15–20 spermine units. In our previous articles,<sup>17–20</sup> we showed that an attachment of oligospermine containing 30 spermine units was necessary for carrier-free siRNA delivery to induce gene silencing. Required spermine number in these conjugates can be primarily defined by N/P ratio (number of amino groups/number of phosphate groups). We found that a slightly higher N/P ratio was required for SSO delivery (S<sub>20</sub>-SSO: N/p = 2.1) as compared with siRNA delivery (S<sub>30</sub>-siRNA: N/p = 1.7). This observation may indicate that the S<sub>30</sub>-siRNA is structurally better organized than the S<sub>20</sub>-SSO. In fact, the SSO used in this study (i.e., [ON705]) is a single-stranded 18-mer oligonucleotide that is an about 15-nm-long chain and folds into various 3D structures; the attached oligospermine chain (S<sub>20</sub>) will interact with the negative phosphate groups and afford overall cationic entities of reduced size like a ball of wool. In contrast, siRNA is an assembly of two 21-mer RNA oligonucleotides that form an A-type double helix. The oligospermine (S<sub>30</sub>) attached to siRNA will wind onto the mi-

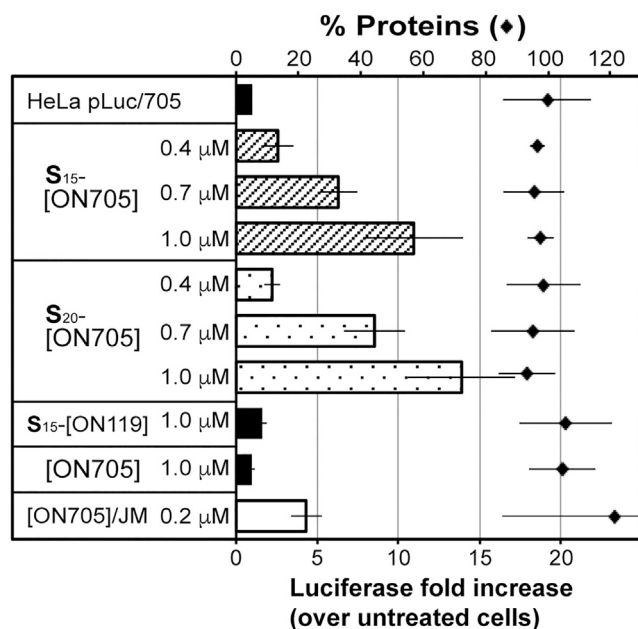

**Figure 6. Carrier-Free Splice Switching in 3D Culture of HeLa pLuc/705 Cells by (S)<sub>15</sub>- and (S)<sub>20</sub>-[ON705]**

(S)<sub>15</sub>- and (S)<sub>20</sub>-[ON705] were added to 2-day-old HeLa pLuc/705 spheroids in serum-containing DMEM (10%). Luciferase activity was determined after 48 hr of incubation. The rhombi indicate the total protein measurement. All data are presented as mean ± SEM of n = 3 separate experiments. JM, JetMessenger.

## MATERIALS AND METHODS

### Synthesis of 2'-O-Methyl Oligonucleotide Phosphorothioate-Oligospermine Conjugates

Oligonucleotide synthesis reagents were purchased from Glen Research/Eurogentec (Paris, France; reference G.R.). All reagents including the DMT-spermine phosphoramidite are commercially available. Oligonucleotides and their oligospermine conjugates were prepared on an automated Expedite 8900 nucleic acid synthesis system (GMI, USA) at 1-μmol scale using modified procedures based on the standard instrumental protocol as described previously.<sup>20</sup> Phosphorothioate linkages were introduced using 3-((N,N-dimethylaminomethylidene)amino)-[3H]-1,2,4-dithiazole-5-thione (DDTT) sulfurizing reagent (G.R. 40-4137-51). 3'-(6-FAM) CPG (G.R. 20-2961-41) was used to introduce fluorescein label. All oligonucleotides were synthesized with final DMT-ON conditions. Coupling yields were evaluated by measuring the absorbance at 504 nm of several selected DMT fractions (e.g., the second, the last, before and after spermine couplings), which were diluted to 100 mL with 3% trichloroacetic acid (TCA) in dichloromethane as follows: DMT fractions were first diluted to 5 mL (volumetric flask) with dichloromethane before a 250-μL aliquot of the resulting solution (pipetted with a Microman, Gilson pipette equipped with a capillary piston) was transferred into another volumetric flask and completed to 5 mL with 3% TCA in dichloromethane solution. Average coupling yields were >97% for nucleotides and about

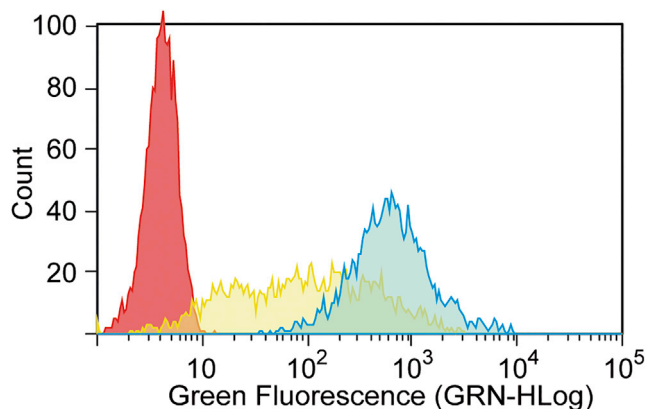

**Figure 7. Delivery of Fluorescently Labeled SSOs in 3D Culture of HeLa pLuc/705 Cells Analyzed by Flow Cytometry**

Untreated spheroids (red, control). [ON705]-(F) (0.2 μM, yellow) complexed with JM (JetMessenger) and (S)<sub>20</sub>-[ON705]-(F) (0.7 μM, blue) were added to 2-day-old HeLa pLuc/705 spheroids in serum-containing DMEM (10%). After 48 hr of incubation, cellular uptake was analyzed using a 488-nm laser.

95% for spermine couplings. For oligonucleotide conjugates, cleavage, successive deprotection steps, and purification were performed according to Glen Research-reported protocols using DNA Glen-Pak columns (G.R. 60-5000-96) except that a vacuum manifold apparatus was not used. Solutions were manually added using 1-mL plastic syringes. Overall yields (Table 1) were driven from the final stock solution concentrations as measured from their absorption at 260 nm and then calculated using extinction coefficients estimated by the described empirical formula.<sup>38</sup> MALDI-TOF mass spectra were obtained in positive mode on a Bruker Ultraflex apparatus with hydroxypicolinic acid or trihydroxyacetophenone combined, with or without diammonium citrate as matrix (Figures S3–S10).

The single-stranded [ON705] was targeted to the aberrant splice site.<sup>23,39</sup> Oligonucleotides with scrambled sequence ([ON705scr])<sup>40</sup> or with one mismatch ([ON705mis]) were used as negative controls. An oligonucleotide [ON119] targeted to position 119 of β-globin intron 2 was used as an additional negative control.<sup>24</sup>

### SDS-PAGE of SSOs

Four hundred pmol of single-strand oligospermine conjugates were loaded on 4%–12% Bis-Tris precast gels (Criterion XT; Bio-Rad). Electrophoresis was carried out in XT-MES denaturing running buffer during 2 hr at 75 V. Precast gels were then incubated in ethidium bromide (0.5 μg/mL) and analyzed.

### Cell Culture

HeLa cells transfected with pLuc/705 were kindly provided by Dr. R. Kole.<sup>23,24</sup> Cells were grown in low-glucose DMEM (Sigma-Aldrich, St. Louis, MO, USA) supplemented with 10% fetal bovine serum (FBS) (Perbio, Brebieres, France), 100 U/mL penicillin, 100 μg/mL

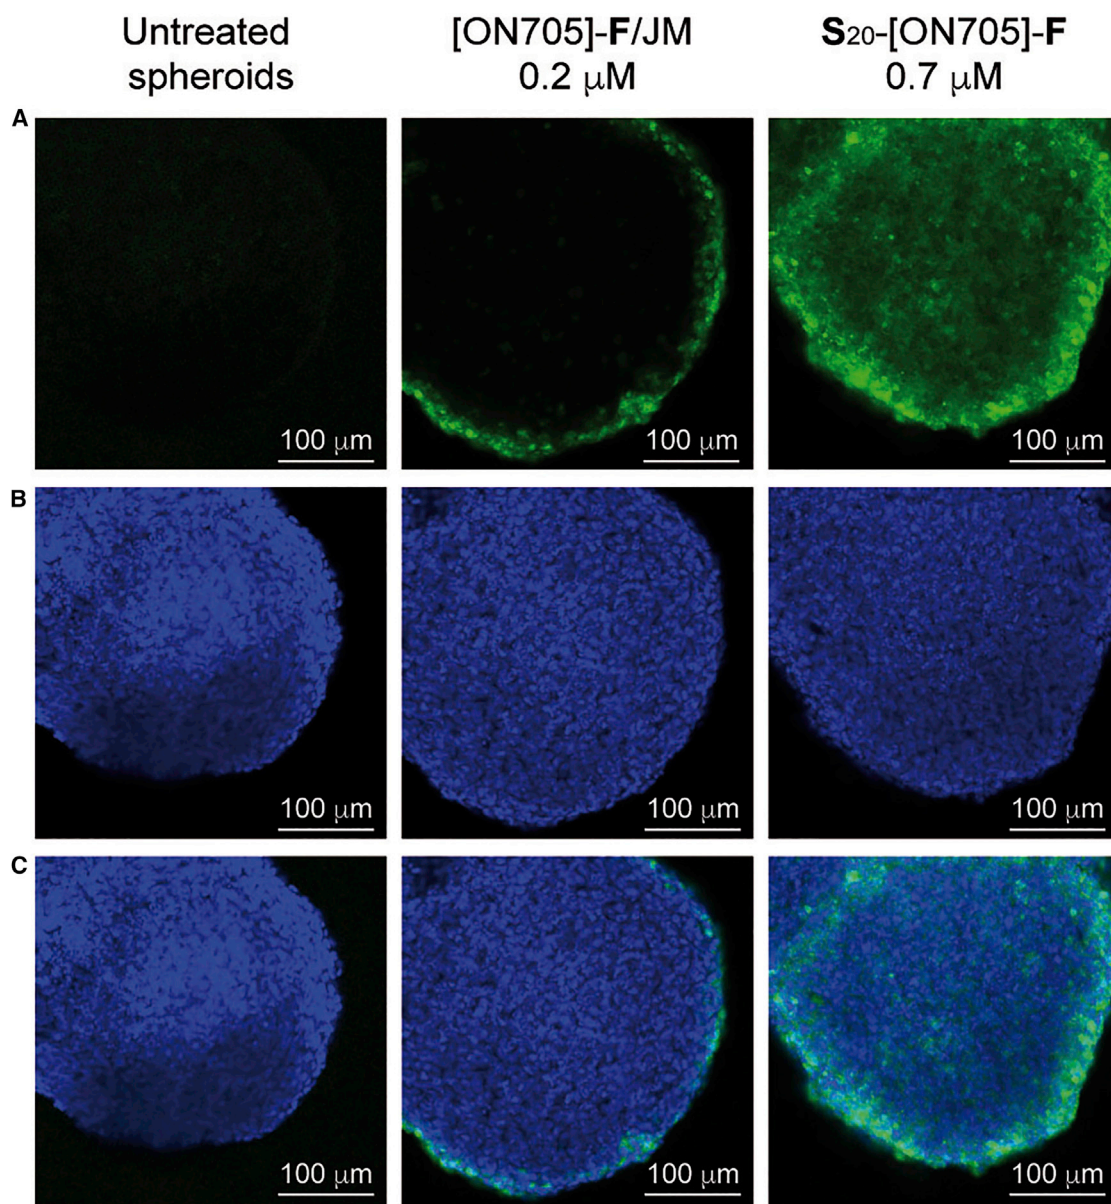

**Figure 8. Delivery of Fluorescently Labeled SSOs in 3D Culture of HeLa pLuc/705 Cells Analyzed by Confocal Microscopy**

To 2-day-old HeLa pLuc/705 spheroids in serum-containing DMEM (10%) was added [ON705]-F complexed with JM (JetMessenger) or (S)<sub>20</sub>-[ON705]-F. Images were taken after 48 hr. (A) Fluorescein (488 nm). (B) Nuclei (405 nm). (C) Merge.

streptomycin (Eurobio), and 200 μg/mL hygromycin B (Invitrogen, Carlsbad, CA, USA).

#### Cellular Uptake of S<sub>20</sub>-[ON705] in HeLa pLuc/705 Cells

HeLa pLuc/705 cells ( $2.5 \times 10^4$  per well) were seeded in four-chambered Lab-Tek plates (Ref 155383; Nunc, Rochester, NY, USA) in 500 μL of complete medium the day before their use. Cells were then incubated with 0.4 and 1.0 μM SSOs [ON705]-F and S<sub>20</sub>-[ON705]-F, respectively, both fluorescently labeled with fluorescein.

Cells were observed after 45 min, 2 hr, and 4 hr in red-phenol-free DMEM by fluorescent microscopy (Axiovert 25; Zeiss, Germany).

#### Transfection with Cationic Oligospermene Conjugates

Twenty-four hours prior to transfection,  $6 \times 10^3$  cells per well were seeded in 96-well tissue culture plates (Corning, NY, USA) in 100 μL of DMEM containing 10% FBS. The spermine-grafted SSOs were diluted up to 100 μL in serum-free or serum-containing DMEM and then added onto HeLa pLuc/705 cells after washing.



After 4 hr, 10  $\mu$ L of FBS was added on serum-free transfected cells. As positive controls, cells were transfected with 0.2  $\mu$ M [ON705] complexed with JetMessenger (JM; Polyplus-Transfection, Illkirch, France) according to the supplier's instructions. All cells were incubated for 48 hr at 37°C in 5% CO<sub>2</sub> humidified atmosphere.

### Splice-Switching Longevity Study

Twenty-four hours prior to transfection,  $5 \times 10^4$  HeLa pLuc/705 cells per well were seeded in 24-well tissue culture plates (Corning, NY) in 0.5 mL of DMEM complete medium. Spermine-conjugated oligonucleotides S<sub>15</sub>-[ON705] (0.6  $\mu$ M), S<sub>20</sub>-[ON705] (0.5  $\mu$ M), S<sub>30</sub>-[ON705] (0.3  $\mu$ M), S<sub>15</sub>-[ON119] (0.6  $\mu$ M), and S<sub>15</sub>-[ON705scr] (0.6  $\mu$ M) were diluted in 300  $\mu$ L of serum-free DMEM and added to cells after washing. After 4 hr, FBS was added up to a final 10% concentration. Luciferase reporter gene expression was measured 11, 21, 45, and 69 hr after delivery with spermine-grafted SSOs. After 69 hr, transfected and non-transfected HeLa pLuc/705 cells were split in new 24-well tissue culture plates at  $5 \times 10^4$  cells per well to maintain exponential growth. The restoration of luciferase gene expression was then determined 95, 118, and 142 hr after transfection.

### Luciferase Activity

HeLa pLuc/705 cells were rinsed with PBS and were lysed (40  $\mu$ L/well for 96-well plates and 100  $\mu$ L for 24-well plates) with cell culture lysis buffer (Promega, Madison, WI, USA) at room temperature for 30 min. After collecting and centrifuging the cell lysates, the luciferase enzyme activity was quantified from supernatant lysate after addition of 50  $\mu$ L of luciferin solution (Promega) with a Centro LB960 luminometer (Bertold, Thoiry, France). The protein concentration in the extract was measured by the BCA protein assay kit (Uptima; Interchim, Montluçon, France). Final luciferase activity was first measured as relative light units integrated for 10 s per milligram of cell protein (RLU/mg) and then converted to the increase of luciferase expression relative to the luciferase level of untreated HeLa pLuc/705 cells.

### Generation and Transfection of Multicellular Spheroids

HeLa pLuc/705 MCTSs were generated using the hanging drop method.<sup>30</sup> Starting from a monolayer cell culture, cells were resuspended in growth medium containing 20% methyl cellulose (Sigma) at a concentration of  $1 \times 10^5$  cells/mL. Twenty-five-microliter drops containing  $2.5 \times 10^3$  cells were prepared on 90-mm Petri dishes lids (Greiner, Frickenhausen, Germany) and then inverted to obtain hanging drops that were incubated at 37°C. After 48 hr, 12 MCTSs per well were transferred in non-treated 96-well plates. Single-strand oligonucleotides S<sub>15</sub>-[ON705], S<sub>20</sub>-[ON705], S<sub>15</sub>-[ON119], and [ON705] were prepared in 100  $\mu$ L of complete DMEM and added to the spheroids. Control assays for MCTSs with unconjugated [ON705] transfected with JetMessenger were performed in the same way as for monolayer assays. All experiments were done in quadruplicate. After 48 hr, spheroids were washed with PBS and lysed for quantification of luciferase activity.

### Flow Cytometry

Six 2-day-old spheroids per well were transferred in non-treated 96-well plates. Forty-eight hours after transfection with fluorescently labeled SSOs ([ON705]-F complexed with JetMessenger and S<sub>20</sub>-[ON705]-F), cells were trypsinized and resuspended in PBS. Single-cell suspensions were analyzed by flow cytometry on a Guava easy-Cyte HT Cytometer (Merck Millipore) using a 488-nm laser.

### Confocal Microscopy

Two-day-old spheroids were transferred in non-treated 96-well plates for transfection with fluorescently labeled SSOs: [ON705]-F complexed with JetMessenger and S<sub>20</sub>-[ON705]-F. Cell nuclei were stained with Hoechst 33258 (Sigma-Aldrich). After fixation in 4% paraformaldehyde, transfected spheroids were mounted with Kaiser's glycerol gelatine (Millipore, Darmstadt, Germany). Pictures were taken with a Leica TSC SPE confocal microscope (Leica Microsystems, Mannheim, Germany).

### SUPPLEMENTAL INFORMATION

Supplemental Information includes ten figures and can be found with this article online at <https://doi.org/10.1016/j.omtn.2018.09.027>.

### AUTHOR CONTRIBUTIONS

Conceptualization, J.-P.B., J.-S.R., and M.K.; Methodology, M.N. and M.K.; Investigation, M.N., P.P.-L., and M.K.; Writing, M.N. and M.K.; Supervision and Project Administration, J.-P.B. and J.-S.R.

### CONFLICTS OF INTEREST

The authors have no conflicts of interest.

### ACKNOWLEDGMENTS

HeLa pLuc/705 cells were a generous gift of Dr. R. Kole (University of North Carolina, Chapel Hill, NC, USA). The authors thank Dr. G. Chaubet and Dr. A. Wagner for review of the manuscript and Dr. Jean-Marc Strub for mass spectrometry data of the conjugates. This work was supported by the CNRS, Université de Strasbourg, the Association Française contre les Myopathies (AFM), and the International Center for Frontier Research in Chemistry (icFRC; Université de Strasbourg, France).

### REFERENCES

- Lim, K.R.Q., Maruyama, R., and Yokota, T. (2017). Eteplirsin in the treatment of Duchenne muscular dystrophy. *Drug Des. Devel. Ther.* *11*, 533–545.
- Havens, M.A., and Hastings, M.L. (2016). Splice-switching antisense oligonucleotides as therapeutic drugs. *Nucleic Acids Res.* *44*, 6549–6563.
- Kole, R., and Krieg, A.M. (2015). Exon skipping therapy for Duchenne muscular dystrophy. *Adv. Drug Deliv. Rev.* *87*, 104–107.
- Evers, M.M., Toonen, L.J.A., and van Roon-Mom, W.M.C. (2015). Antisense oligonucleotides in therapy for neurodegenerative disorders. *Adv. Drug Deliv. Rev.* *87*, 90–103.
- Kole, R., Krainer, A.R., and Altman, S. (2012). RNA therapeutics: beyond RNA interference and antisense oligonucleotides. *Nat. Rev. Drug Discov.* *11*, 125–140.
- Järver, P., O'Donovan, L., and Gait, M.J. (2014). A chemical view of oligonucleotides for exon skipping and related drug applications. *Nucleic Acid Ther.* *24*, 37–47.

7. Godfrey, C., Desviat, L.R., Smedsrød, B., Piétri-Rouxel, F., Denti, M.A., Disterer, P., Lorain, S., Nogales-Gadea, G., Sardone, V., Anwar, R., et al. (2017). Delivery is key: lessons learnt from developing splice-switching antisense therapies. *EMBO Mol. Med.* 9, 545–557.
8. Juliano, R.L. (2016). The delivery of therapeutic oligonucleotides. *Nucleic Acids Res.* 44, 6518–6548.
9. Krhac Levacic, A., Morys, S., and Wagner, E. (2017). Solid-phase supported design of carriers for therapeutic nucleic acid delivery. *Biosci. Rep.* 37, BSR20160617.
10. Shen, X., and Corey, D.R. (2018). Chemistry, mechanism and clinical status of antisense oligonucleotides and duplex RNAs. *Nucleic Acids Res.* 46, 1584–1600.
11. Pons, B., Kotera, M., Zuber, G., and Behr, J.P. (2006). Online synthesis of diblock cationic oligonucleotides for enhanced hybridization to their complementary sequence. *ChemBioChem* 7, 1173–1176.
12. Voirin, E., Behr, J.P., and Kotera, M. (2007). Versatile synthesis of oligodeoxyribonucleotide-oligospermine conjugates. *Nat. Protoc.* 2, 1360–1367.
13. Noir, R., Kotera, M., Pons, B., Remy, J.S., and Behr, J.P. (2008). Oligonucleotide-oligospermine conjugates (zip nucleic acids): a convenient means of finely tuning hybridization temperatures. *J. Am. Chem. Soc.* 130, 13500–13505.
14. Moreau, V., Voirin, E., Paris, C., Kotera, M., Nothisen, M., Rémy, J.S., Behr, J.P., Erbacher, P., and Lenne-Samuel, N. (2009). Zip nucleic acids: new high affinity oligonucleotides as potent primers for PCR and reverse transcription. *Nucleic Acids Res.* 37, e130.
15. Paris, C., Moreau, V., Deglane, G., Voirin, E., Erbacher, P., and Lenne-Samuel, N. (2010). Zip nucleic acids are potent hydrolysis probes for quantitative PCR. *Nucleic Acids Res.* 38, e95.
16. Navarro, E., Serrano-Heras, G., Castaño, M.J., and Solera, J. (2015). Real-time PCR detection chemistry. *Clin. Chim. Acta* 439, 231–250.
17. Nothisen, M., Kotera, M., Voirin, E., Remy, J.S., and Behr, J.P. (2009). Cationic siRNAs provide carrier-free gene silencing in animal cells. *J. Am. Chem. Soc.* 131, 17730–17731.
18. Paris, C., Moreau, V., Deglane, G., Karim, L., Couturier, B., Bonnet, M.E., Kedinger, V., Messmer, M., Bolcato-Bellemin, A.L., Behr, J.P., et al. (2012). Conjugating phosphopermines to siRNAs for improved stability in serum, intracellular delivery and RNAi-mediated gene silencing. *Mol. Pharm.* 9, 3464–3475.
19. Perche, P., Nothisen, M., Bagilet, J., Behr, J.P., Kotera, M., and Remy, J.S. (2013). Cell-penetrating cationic siRNA and lipophilic derivatives efficient at nanomolar concentrations in the presence of serum and albumin. *J. Control. Release* 170, 92–98.
20. Nothisen, M., Bagilet, J., Behr, J.P., Remy, J.S., and Kotera, M. (2016). Structure tuning of cationic oligospermine-siRNA conjugates for carrier-free gene silencing. *Mol. Pharm.* 13, 2718–2728.
21. Gagnon, K.T., Watts, J.K., Pendergraft, H.M., Montailier, C., Thai, D., Potier, P., and Corey, D.R. (2011). Antisense and antigene inhibition of gene expression by cell-permeable oligonucleotide-oligospermine conjugates. *J. Am. Chem. Soc.* 133, 8404–8407.
22. Nakamoto, K., Akao, Y., Furuichi, Y., and Ueno, Y. (2018). Enhanced intercellular delivery of crGD-siRNA conjugates by an additional oligospermine modification. *ACS Omega* 3, 8226–8232.
23. Dominski, Z., and Kole, R. (1993). Restoration of correct splicing in thalassemic pre-mRNA by antisense oligonucleotides. *Proc. Natl. Acad. Sci. USA* 90, 8673–8677.
24. Kang, S.H., Cho, M.J., and Kole, R. (1998). Up-regulation of luciferase gene expression with antisense oligonucleotides: implications and applications in functional assay development. *Biochemistry* 37, 6235–6239.
25. Carver, K., Ming, X., and Juliano, R.L. (2014). Multicellular tumor spheroids as a model for assessing delivery of oligonucleotides in three dimensions. *Mol. Ther. Nucleic Acids* 3, e153.
26. Sutherland, R.M. (1988). Cell and environment interactions in tumor microregions: the multicell spheroid model. *Science* 240, 177–184.
27. Hirschhaeuser, F., Menne, H., Dittfeld, C., West, J., Mueller-Klieser, W., and Kunz-Schughart, L.A. (2010). Multicellular tumor spheroids: an underestimated tool is catching up again. *J. Biotechnol.* 148, 3–15.
28. Thoma, C.R., Zimmermann, M., Agarkova, I., Kelm, J.M., and Krek, W. (2014). 3D cell culture systems modeling tumor growth determinants in cancer target discovery. *Adv. Drug Deliv. Rev.* 69–70, 29–41.
29. Weiswald, L.B., Bellet, D., and Dangles-Marie, V. (2015). Spherical cancer models in tumor biology. *Neoplasia* 17, 1–15.
30. Timmins, N.E., and Nielsen, L.K. (2007). Generation of multicellular tumor spheroids by the hanging-drop method. In *Tissue Engineering. Methods in Molecular Medicine, Volume 140*, H. Hauser and M. Fussenegger, eds (Humana Press), pp. 141–151.
31. Allen, T.M., and Cullis, P.R. (2013). Liposomal drug delivery systems: from concept to clinical applications. *Adv. Drug Deliv. Rev.* 65, 36–48.
32. Kanasty, R., Dorkin, J.R., Vegas, A., and Anderson, D. (2013). Delivery materials for siRNA therapeutics. *Nat. Mater.* 12, 967–977.
33. Nguyen, J., and Szoka, F.C. (2012). Nucleic acid delivery: the missing pieces of the puzzle? *Acc. Chem. Res.* 45, 1153–1162.
34. Kopatz, I., Remy, J.S., and Behr, J.P. (2004). A model for non-viral gene delivery: through syndecan adhesion molecules and powered by actin. *J. Gene Med.* 6, 769–776.
35. Morcos, P.A., Li, Y., and Jiang, S. (2008). Vivo-Morpholinos: a non-peptide transporter delivers Morpholinos into a wide array of mouse tissues. *Biotechniques* 45, 613–614, 616, 618 passim.
36. Li, Y.F., and Morcos, P.A. (2008). Design and synthesis of dendritic molecular transporter that achieves efficient in vivo delivery of morpholino antisense oligo. *Bioconjug. Chem.* 19, 1464–1470.
37. Moulton, H.M., and Moulton, J.D. (2010). Morpholinos and their peptide conjugates: therapeutic promise and challenge for Duchenne muscular dystrophy. *Biochim. Biophys. Acta* 1798, 2296–2303.
38. Brown, T., and Brown, D.J.S. (1991). Modern machine-aided methods of oligodeoxyribonucleotide synthesis. In *Oligonucleotides and Analogues: A Practical Approach*, F. Eckstein, ed. (IRL Press at Oxford University Press), pp. 1–24.
39. Sierakowska, H., Sambade, M.J., Agrawal, S., and Kole, R. (1996). Repair of thalassemic human  $\beta$ -globin mRNA in mammalian cells by antisense oligonucleotides. *Proc. Natl. Acad. Sci. USA* 93, 12840–12844.
40. Resina, S., Kole, R., Travo, A., Lebleu, B., and Thierry, A.R. (2007). Switching on transgene expression by correcting aberrant splicing using multi-targeting steric-blocking oligonucleotides. *J. Gene Med.* 9, 498–510.

**OMTN, Volume 13**

**Supplemental Information**

**Cationic Oligospermine-Oligonucleotide**

**Conjugates Provide Carrier-free Splice**

**Switching in Monolayer Cells and Spheroids**

**Marc Nothisen, Phanélie Perche-Létuvée, Jean-Paul Behr, Jean-Serge Remy, and Mitsuharu Kotera**

## Supplemental Information

# Cationic oligospermine-oligonucleotide conjugates provide carrier-free splice switching in monolayer cells and in spheroids

Marc Nothisen<sup>1</sup>, Phanélie Perche-Létuvé<sup>2</sup>, Jean-Paul Behr<sup>2</sup>, Jean-Serge Remy<sup>1</sup>, and Mitsuharu Kotera<sup>2</sup>

<sup>1</sup>Laboratoire de Chimie Biofonctionnelle, Université de Strasbourg, CNRS, CAMB UMR 7199, LabEx MEDALIS, Faculté de Pharmacie, F-67400 Illkirch, France

<sup>2</sup>Laboratoire V-SAT, Université de Strasbourg, CNRS, CAMB UMR 7199, LabEx MEDALIS, Faculté de Pharmacie, F-67400 Illkirch, France

### Content

|                                                                                                                   |    |
|-------------------------------------------------------------------------------------------------------------------|----|
| SDS-PAGE of <b>S<sub>n</sub></b> -SSOs.....                                                                       | S2 |
| Delivery of fluorescently labelled SSOs in 3D culture of HeLa pLuc/705 cells analyzed by confocal microscopy..... | S3 |
| MALDI-TOF spectrum of [ON705].....                                                                                | S4 |
| MALDI-TOF spectrum of <b>S<sub>5</sub></b> -[ON705].....                                                          | S4 |
| MALDI-TOF spectrum of <b>S<sub>15</sub></b> -[ON705].....                                                         | S5 |
| MALDI-TOF spectrum of <b>S<sub>20</sub></b> -[ON705].....                                                         | S5 |
| MALDI-TOF spectrum of <b>S<sub>20</sub></b> -[ON705mis].....                                                      | S6 |
| MALDI-TOF spectrum of <b>S<sub>20</sub></b> -[ON705]-F.....                                                       | S6 |
| MALDI-TOF spectrum of [ON705]-F.....                                                                              | S7 |
| MALDI-TOF spectrum of [ON705]-F (extended).....                                                                   | S7 |

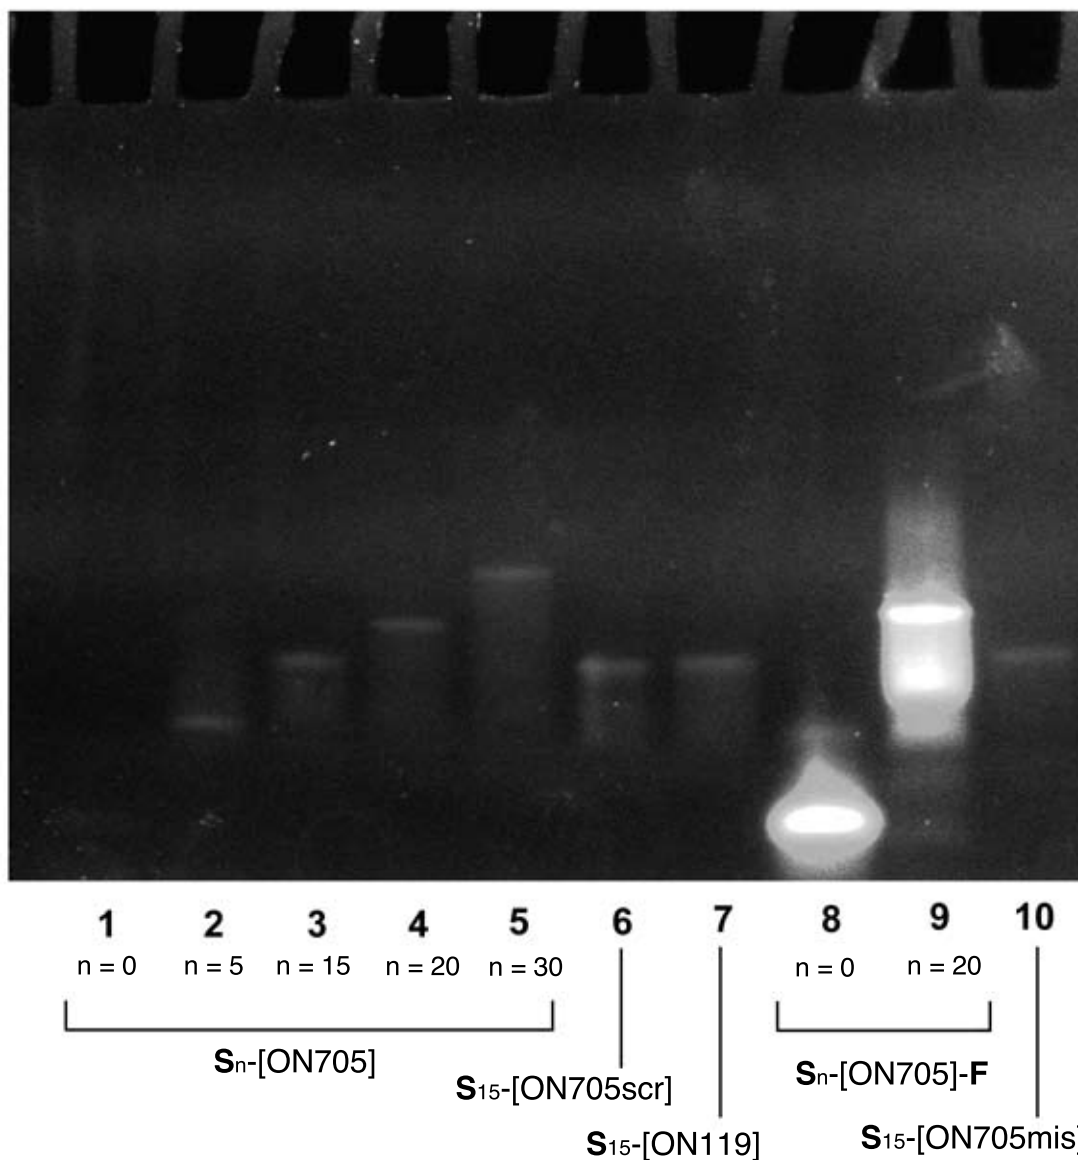

**Figure S1.** SDS-PAGE of  $S_n$ -SSOs. 400 pmoles of single strand oligospermine conjugates were loaded on 4-12% Bis-Tris precast gels (Criterion<sup>TM</sup> XT, Bio-Rad). Electrophoresis was carried out in XT-MES denaturing running buffer during 2 h at 75 V. Precast gels were then incubated in ethidium bromide (0.5  $\mu$ g/mL) and analyzed. Lane 1, [ON705]. Lane 2-5,  $S_n$ -[ON705] ( $n = 5, 15, 20, 30$ ). Lane 6,  $S_{15}$ -[ON705scr]. Lane 7,  $S_{15}$ -[ON119]. Lane 8, [ON705]-F. Lane 9,  $S_{20}$ -[ON705]-F. Lane 10,  $S_{15}$ -[ON705mis].

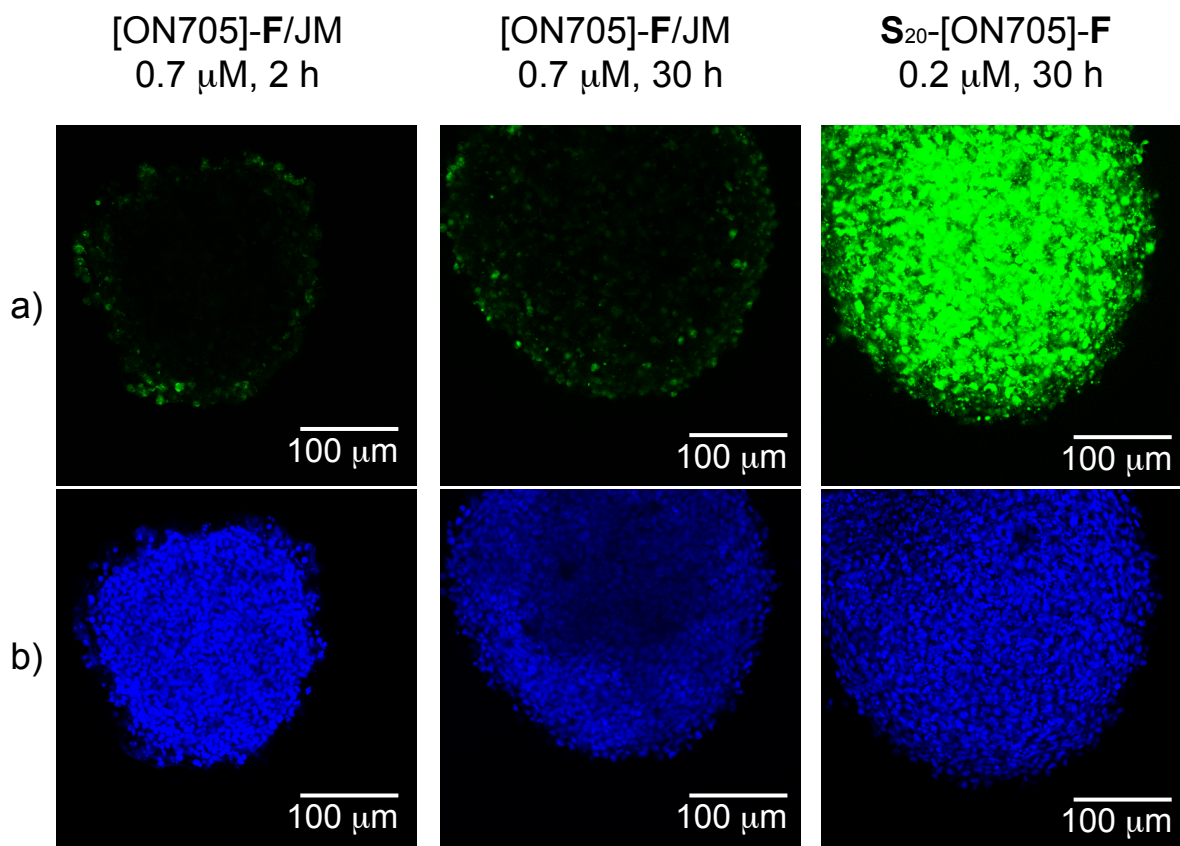

**Figure S2.** Delivery of fluorescently labelled SSOs in 3D culture of HeLa pLuc/705 cells analyzed by confocal microscopy. To 2-day old HeLa pLuc/705 spheroids in serum-containing DMEM (10%) was added [ON705]-F complexed with JM (JetMessenger™) or S<sub>20</sub>-[ON705]-F. Images were taken after 2 h and 30 h. a) Fluorescein (488 nm), b) Nuclei (405 nm).

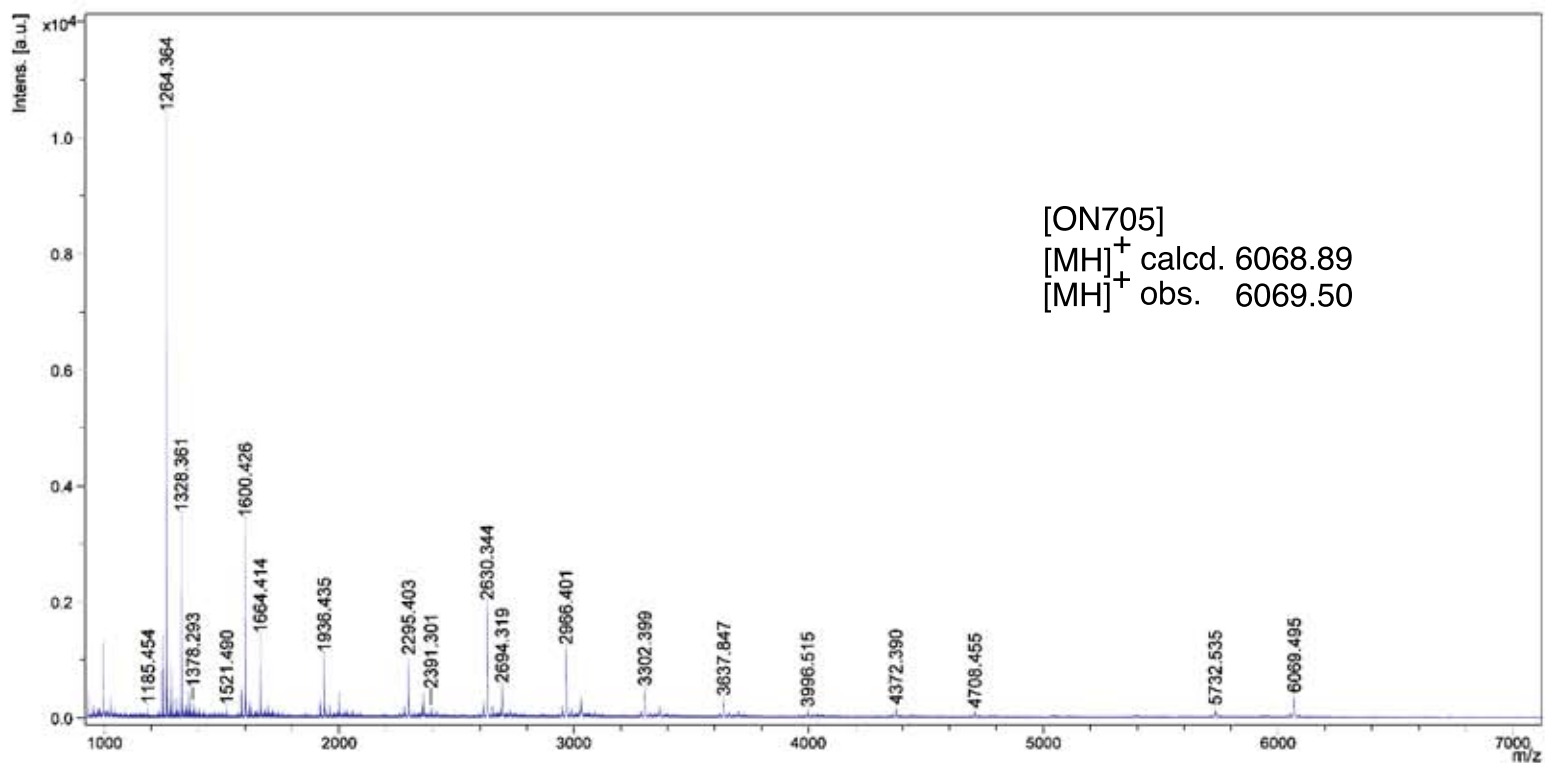

Figure S3. MALDI-TOF spectrum of [ON705]

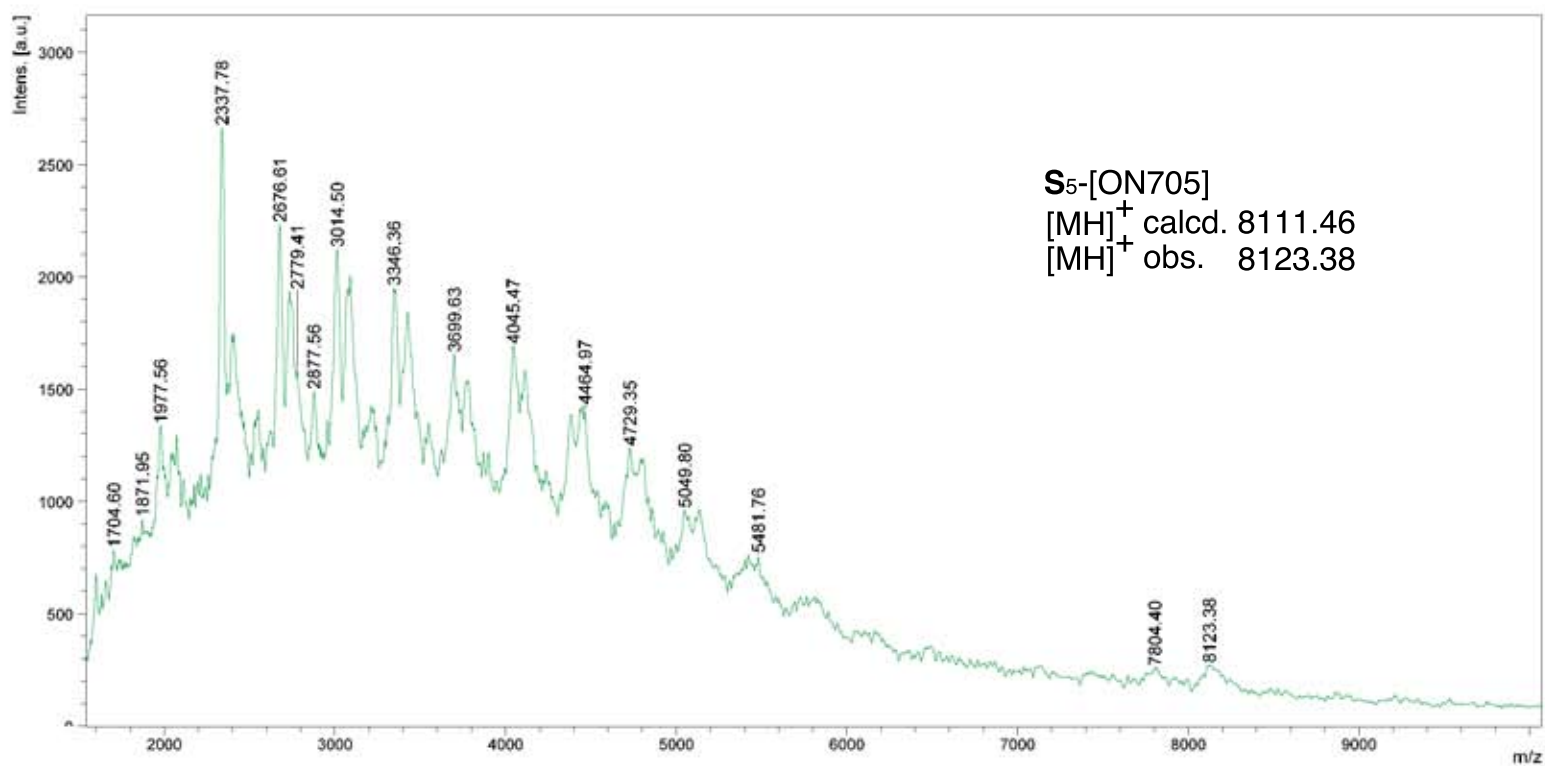

Figure S4. MALDI-TOF spectrum of S5-[ON705]

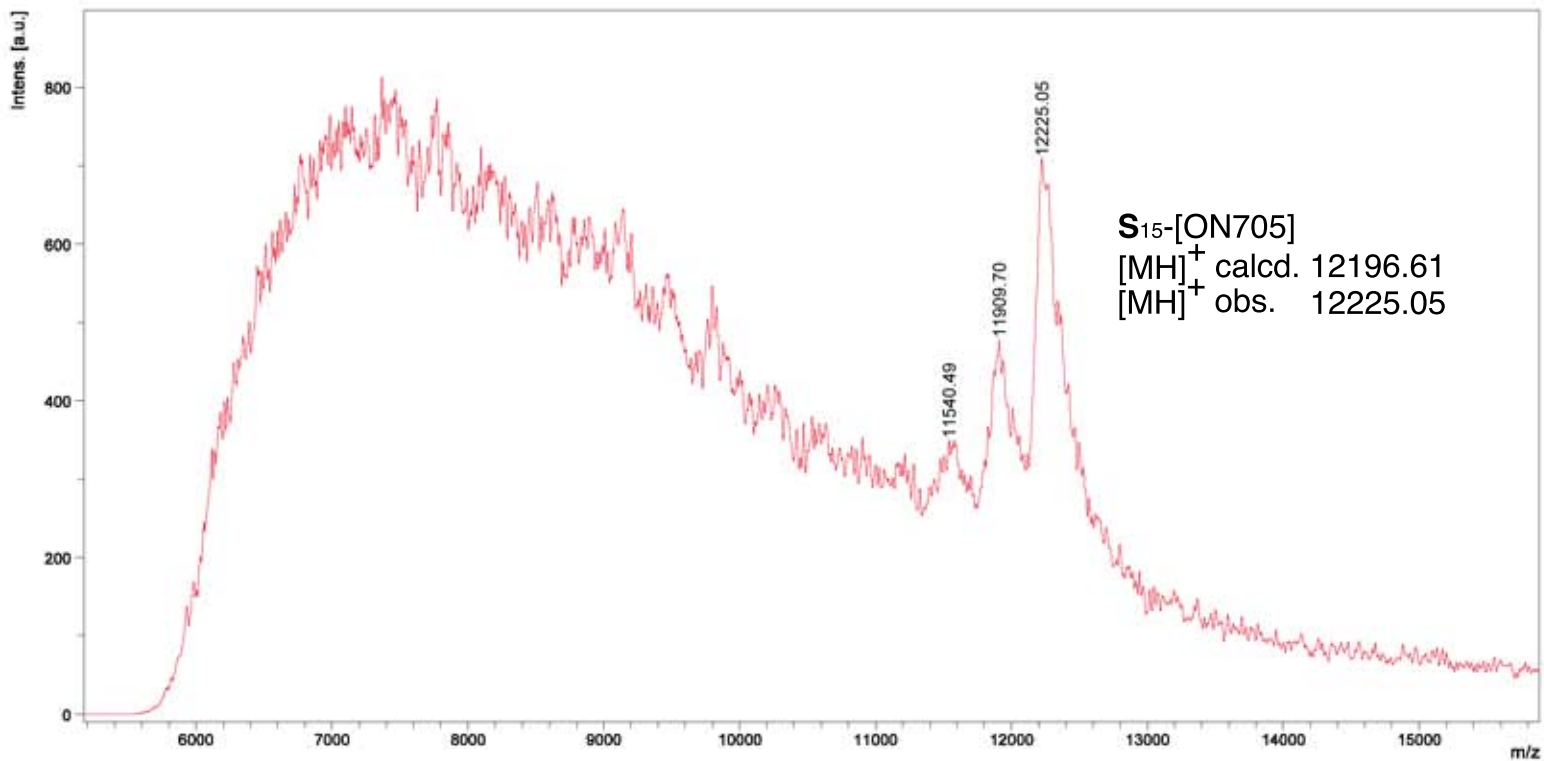

Figure S5. MALDI-TOF spectrum of S15-[ON705]

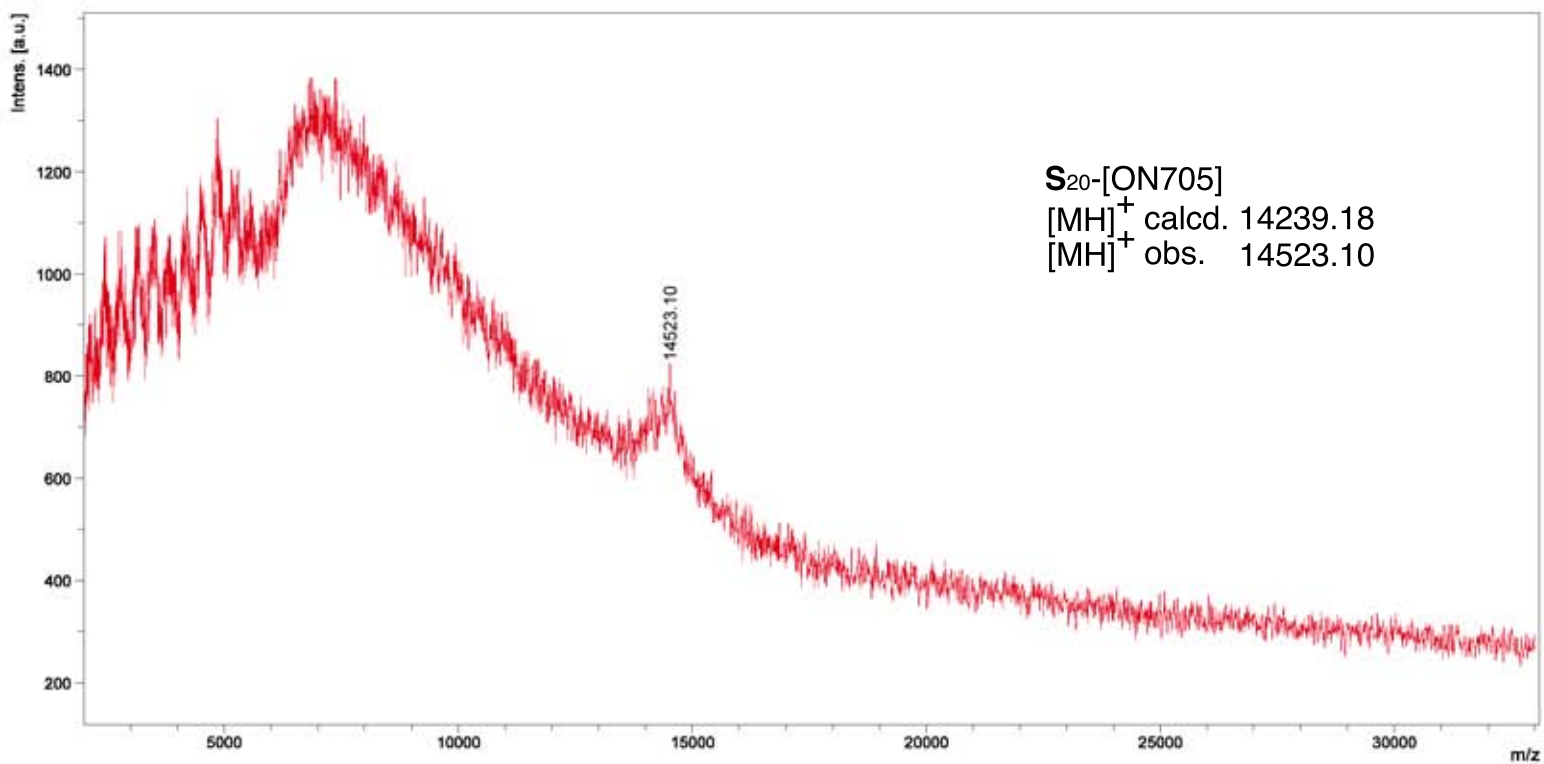

Figure S6. MALDI-TOF spectrum of S20-[ON705]



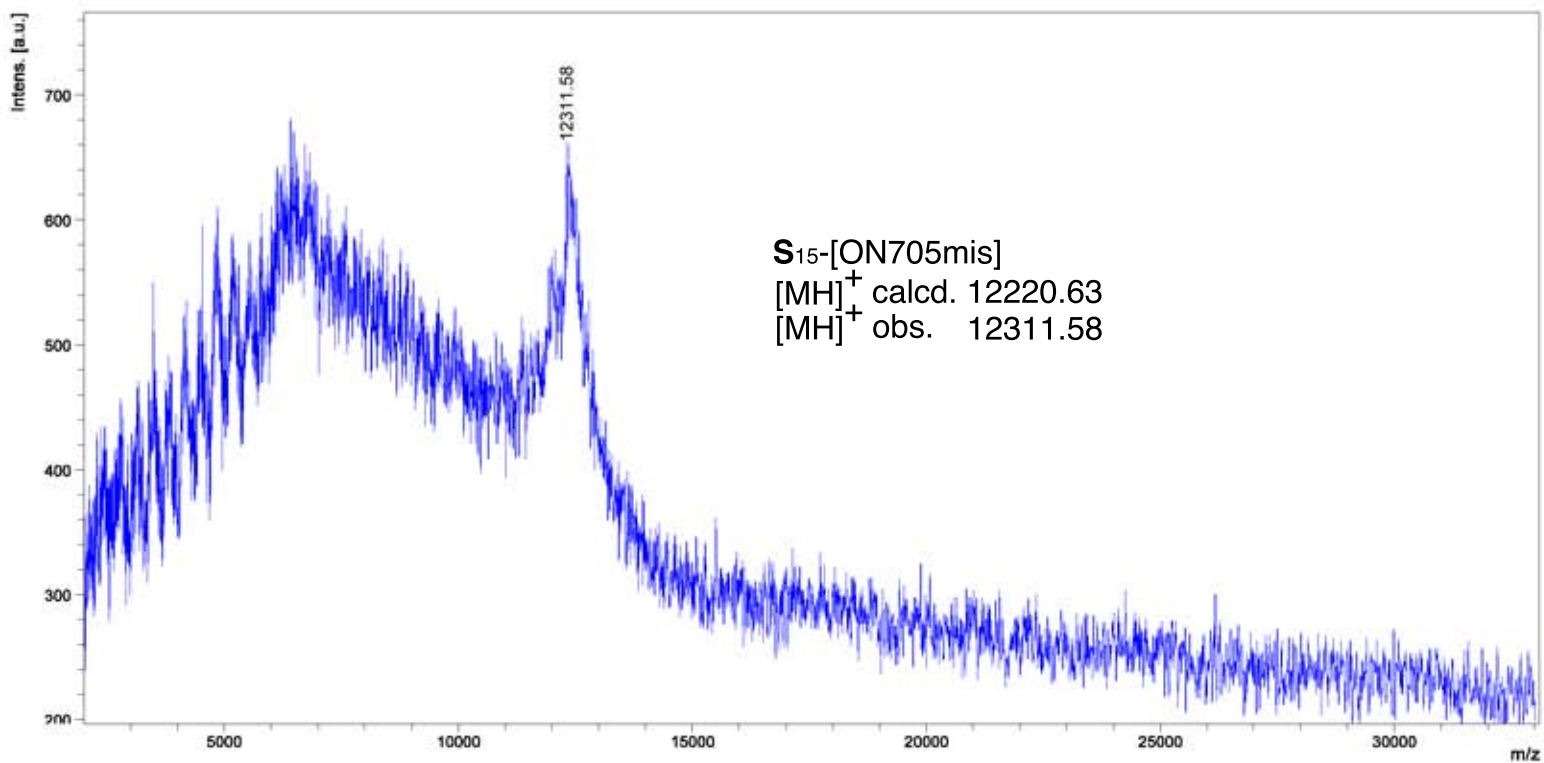

Figure S7. MALDI-TOF spectrum of S20-[ON705mis]

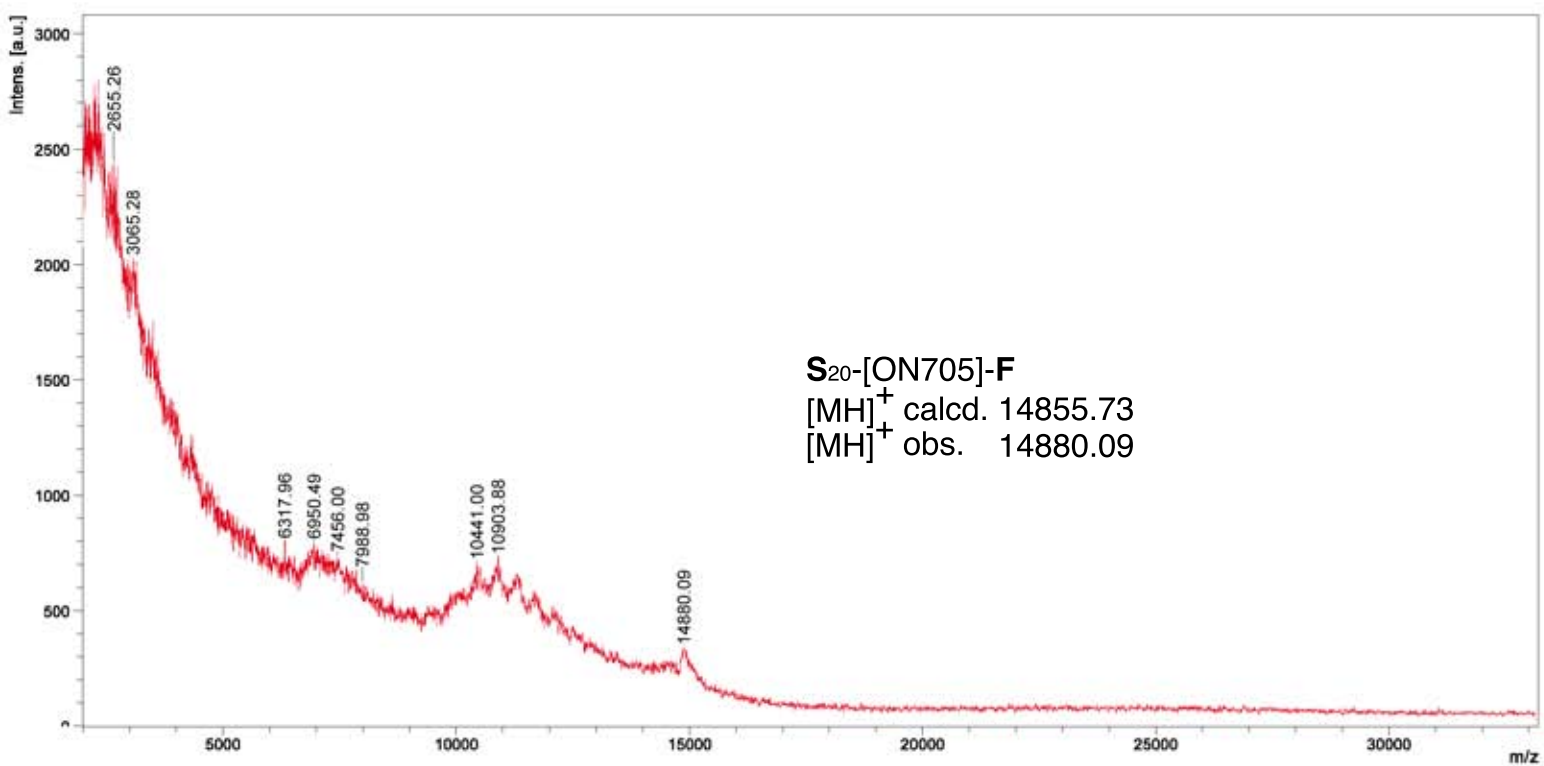

Figure S8. MALDI-TOF spectrum of S20-[ON705]-F

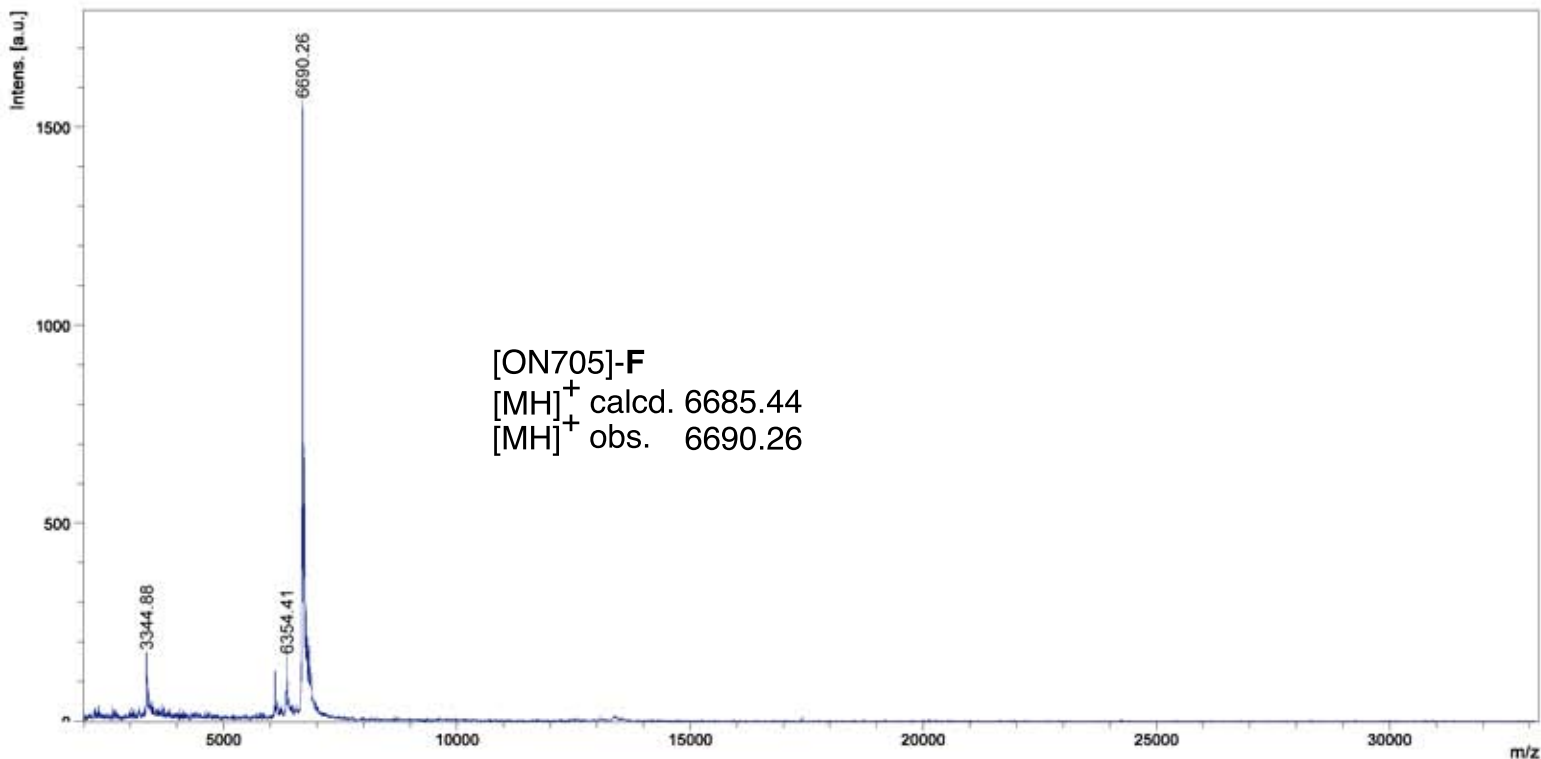

Figure S9. MALDI-TOF spectrum of [ON705]-F

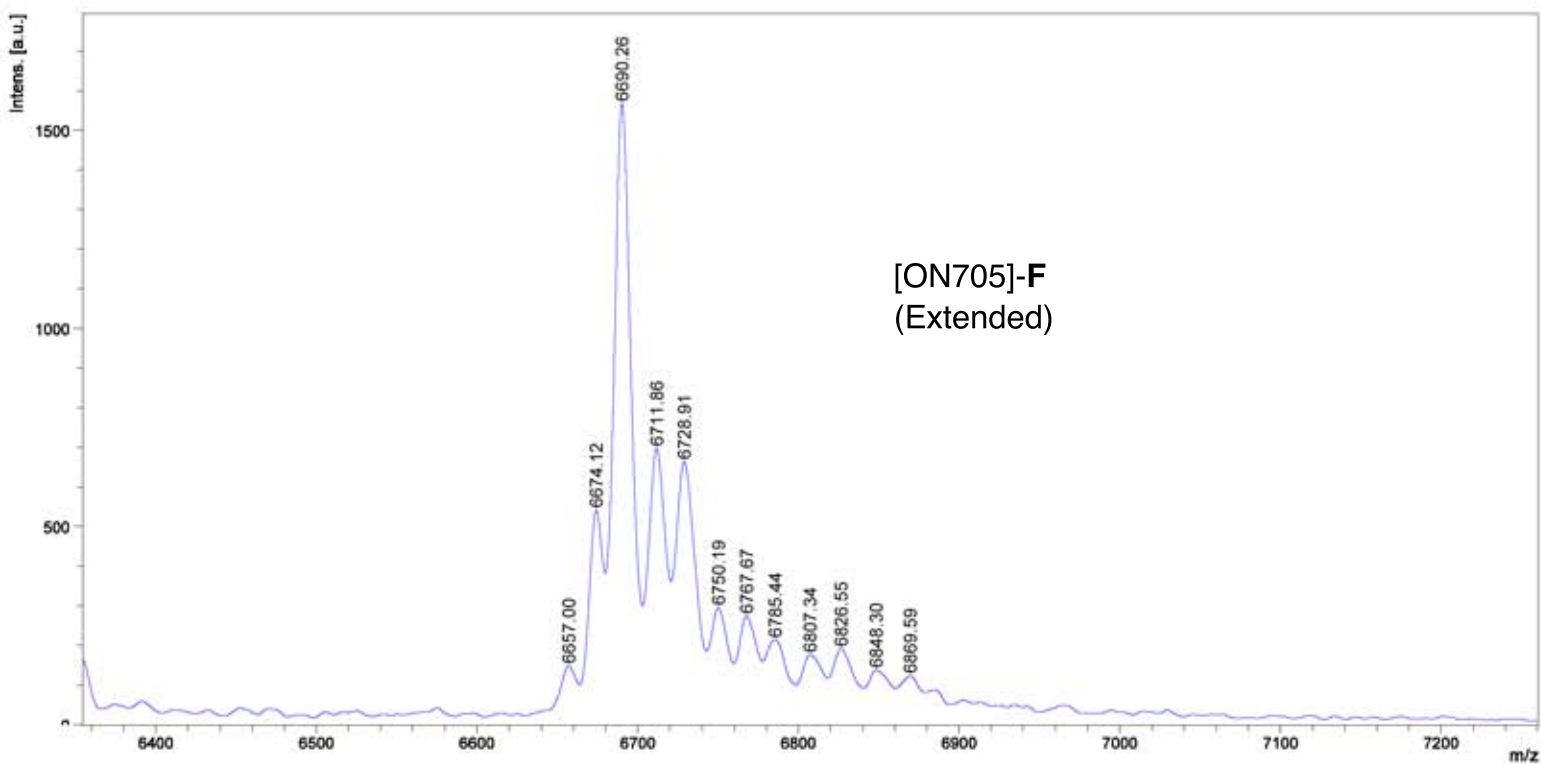

Figure S10. MALDI-TOF spectrum of [ON705]-F (extended)
